# The impact of transition metals on bacterial plant disease

 Helen Fones<sup>1</sup> & Gail M. Preston<sup>2</sup>
<sup>1</sup>Institut für Biologie, Freie Universität Berlin, Berlin, Germany; and <sup>2</sup>Department of Plant Sciences, University of Oxford, Oxford, UK

**Correspondence:** Gail M. Preston,  
Department of Plant Sciences, University of  
Oxford, South Parks Road, Oxford OX1 3RB,  
UK. Tel.: 01865 275132; fax: 01865 275074;  
e-mail: gail.preston@plants.ox.ac.uk

Received 20 May 2012; revised 5 September  
2012; accepted 14 September 2012. Final  
version published online 21 November 2012.

DOI: 10.1111/1574-6976.12004

Editor: Colin Berry

## Keywords

metal hyperaccumulator; siderophore;  
ferritin; *mur*; NRAMP; metalloenzyme.

## Abstract

Metals play essential roles in many biological processes but are toxic when present in excess. This makes their transport and homeostatic control of particular importance to living organisms. Within the context of plant–pathogen interactions the availability and toxicity of transition metals can have a substantial impact on disease development. Metals are essential for defensive generation of reactive oxygen species and other plant defences and can be used directly to limit pathogen growth. Metal-based antimicrobials are used in agriculture to control plant disease, and there is increasing evidence that metal hyperaccumulating plants use accumulated metal to limit pathogen growth. Pathogens and hosts compete for available metals, with plants possessing mechanisms to withhold essential metals from invading microbes. Pathogens, meanwhile, use low-metal conditions as a signal to recognise and respond to the host environment. Consequently, metal-sensing systems such as *fur* (iron) and *zur* (zinc) regulate the expression of pathogenicity and virulence genes; and pathogens have developed sophisticated strategies to acquire metal during growth in plant tissues, including the production of multiple siderophores. This review explores the impact of transition metals on the processes that determine the outcome of bacterial infection in plants, with a particular emphasis on zinc, iron and copper.

## Introduction

Plant diseases provide an important social and economic challenge, being responsible yearly for pre- and postharvest losses of 16–28% of crops (Chakraborty & Newton, 2011). It is increasingly understood that the concentration of transition metals in the environment and the availability of essential metals to support pathogen growth can have a significant impact on the outcome of plant–pathogen interactions. In this review we discuss the ways in which transition metals influence the outcome of plant–pathogen interactions, considering both their effects upon the plant, in terms of plant health, defensive signalling and alterations to the environment that the pathogen experiences *in planta*; and their effect upon the pathogen, in terms of mineral nutrition, regulation of virulence gene expression and toxicity. This review will focus on three metals that are of profound interest for their effects on plants and pathogens: iron, copper and zinc. Initially, we give a brief overview of the importance of transition metals for all forms of life, and the ways in which plants

and microbes obtain and regulate their supply of these important but potentially toxic chemicals. We will discuss the ways in which pathogenesis can be dependent upon, or regulated by, metal availability; and how, in turn, this can influence the plants' response to the pathogen. Finally, we discuss the special case of metal hyperaccumulating plants, which maintain high foliar metal concentrations that appear to form an important part of their anti-pathogen defences. These unusual plants may not only provide insights into the role of metals in plant–pathogen interactions, but also genetic resources for the improvement of metal uptake by crops, and insights into the consequences of altering metal availability in crop plants for disease resistance.

## Metals are essential for both plants and plant pathogens

To understand the effects that metals such as copper, zinc and iron have on plant–pathogen interactions, it is necessary to briefly consider their chemistry and the roles in

metabolism that they fulfil. Copper and iron, along with other transition metals, have incompletely filled d-orbitals, conferring strong redox activity; in aqueous solution, their ions may also participate in reactions as Lewis acids (see Box 1). These properties make these metals able to catalyse biochemical reactions, giving them an essential role in metabolism (Nies & Brown, 1998). Zinc is often included in discussions of transition metals, but it does not have an incomplete d-orbital, and it does not participate in redox reactions. Instead, its stability makes it an ideal cofactor for enzymatic reactions that require a stable metal ion to act as a Lewis acid during catalysis. Estimates suggest that as high a fraction as one third of all proteins require some metal cofactor (Waldron & Robinson, 2009). In illustration of the importance of these metals to all life forms, consider that iron has essential roles in oxygen metabolism, electron transport, lipid metabolism and the tricarboxylic acid (TCA) cycle; in fact, there are known to be over 100 metabolic enzymes with iron-based cofactors (Massé & Arguin, 2005; Miethke & Marahiel, 2007). So fundamental are some of its uses that bacteria have been found to have controls both at the gene expression and post-transcriptional level to ensure that iron is directed to the most essential proteins when it is in limited supply (Massé & Gottsmann, 2002; Massé & Arguin, 2005; Zaini *et al.*, 2008).

Zinc is necessary for the functioning of DNA/RNA polymerase enzymes and of ribosomes and in superoxide dismutase (SOD) (Zelko *et al.*, 2002). Zinc also has particular importance for plants, being found in carbonic anhydrase and in stromal processing peptide, and thus contributing to photosynthesis. Additionally, zinc is important for protein structure, with 4% of *Arabidopsis* proteins, for example, containing zinc finger domains (Hänsch & Mendel, 2009). Copper is needed in cytochrome oxidases (Waldron & Robinson, 2009), ascorbate oxidase (Santagostini *et al.*, 2004), SOD (Zelko *et al.*, 2002), polyphenol oxidase (Marusek *et al.*, 2006) and, in plants, in the receptor for the hormone ethylene, an important signal in plant development and disease resistance (Rodríguez *et al.*, 1999). These essential roles are by no means an exhaustive list of the functions of these metals *in vivo*.

Given the essential role of metals in living organisms, it is clear that either a lack, or an excess of essential metals may have a profound effect on a wide range of organisms, and by extension, their interactions. Add to this the fact that availability varies widely in natural situations—zinc, for example, is present at varying concentrations in different soil types (Reeves & Baker, 2000; Hotz & Brown, 2004), including growth limiting concentrations in many agricultural soils – and it becomes clear that the impact of these metals on plant–pathogen interactions must be

taken into consideration in economically important agricultural settings. To gain more insight into the impact of varying metal availability on plant disease it will be necessary to consider in what ways these metals are available to both partners in this interaction.

#### Box 1 Chemical terms

*Lewis acid*: A molecule that is capable of taking part in reactions in which it forms a co-ordinate covalent bond by accepting a pair of electrons. Common examples are  $H^+$  and metal cations:

- (a)  $H^+ + NH_3 \rightarrow NH_4^+$
- (b)  $H^+ + OH^- \rightarrow H_2O$
- (c)  $Cu^{2+} + 4NH_3 \rightarrow Cu(NH_3)_4^{2+}$

*Fenton reaction*: Generation of  $OH^\cdot$  radicals from  $H_2O_2$  by the reduction of  $O_2^{\cdot-}$ , catalysed by redox active metal ions, usually iron in biological systems:

- (1)  $Fe^{3+} + O_2^{\cdot-} \rightarrow Fe^{2+} + O_2$
- (2)  $Fe^{2+} + H_2O_2 \rightarrow Fe^{3+} + OH^- + OH^\cdot$

## Sources of metals

Plants generally have one main source of mineral nutrients: the soil, although foliar fertilisation is also used in some crop management systems. The availability of mineral nutrients in the soil may be further affected by mycorrhizal symbioses and rhizosphere bacteria, detailed discussion of which is beyond the scope of this work. Although some opportunistic and soil-borne pathogens, such as *Ralstonia* spp., can obtain metals directly from the environment (Denny, 2007), pathogens that multiply inside the host are dependent on the host for their metal supply (Hancock & Huisman, 1981; Rico *et al.*, 2011). The importance of, and limitations imposed by, this dependency is at least partially determined by the mode of infection employed. Necrotrophs, such as soft rot pathogens belonging to the genera *Dickeya* and *Pectobacterium* (formerly *Erwinia*), have access to the full range of nutrients found within the colonised tissue, as they break down cell walls and membranes and release metals and other compounds that are sequestered in the vacuole or bound within the cell wall (Hugouvieux-Cotte-Pattat *et al.*, 1996). The tissue colonised may be of importance in determining metal availability, as certain metals may be retained within the roots of plants, particularly if toxic in excess (Lasat *et al.*, 1996; Prasad, 2004); or, if in short supply, will be translocated rapidly to sink tissues. Even within a tissue, there may be heterogeneity of availability as certain cell types may be used preferentially as stores of metals (Küpper *et al.*, 1999, 2004). The pathogens

likely to suffer the most restriction, however, may be xylem pathogens, such as *Xylella fastidiosa* (Hopkins, 1989) to which only those compounds translocated in the xylem are available, and where iron and other metals may be mainly available in chelated forms such as Fe-citrate. This means that metal availability to the pathogen depends both on metal availability to the plant and the plant's requirement for the nutrient in its aerial tissues.

Many biotrophic and hemibiotrophic bacteria, such as *Pseudomonas syringae*, colonise the apoplastic space between the cells of a plant's leaves (Preston, 2000). As these pathogens have no or limited access to intracellular stores such as the vacuole, they face particular challenges in obtaining essential but redox active metals, which are often sequestered in the vacuole for the plants' own protection (Küpper *et al.*, 1999). For hemibiotrophic strains, these difficulties may be obviated at later stages of infection, but they may be considered to be of importance during biotrophic growth.

### Metal uptake, toxicity and homeostasis

Given the importance of metals for life, it is unsurprising that organisms compete for them when they are in short supply, and that they have evolved specific systems that enable them to take up the metal ions that they require. This is of great importance in the case of iron, because, although an abundant metal, it exists most commonly as the insoluble and therefore nonbio-available Fe<sup>3+</sup> in aerobic environments (Miethke & Marahiel, 2007). For many plants and micro-organisms, the solution to this is to produce and secrete diffusible ligands, known as siderophores (Fig. 1), which have high affinities for this otherwise unavailable ferric iron (Romheld & Marschner, 1986; Braud *et al.*, 2009), in conjunction with the synthesis of dedicated uptake proteins for the siderophore-Fe<sup>3+</sup> complex, such as the TonB-dependent uptake system (Cornelis & Matthijs, 2002). Certain bacteria, including the opportunistic pathogen *Burkholderia cenocepacia*, can obtain iron directly from host iron-chelating proteins such as ferritin (Whitby *et al.*, 2006). These abilities, however, are known to have become the subject of an evolutionary arms race between bacterium and host in vertebrate pathosystems (Skaar, 2010), an outcome which also seems likely in phytopathology. This makes the indirect pathway of siderophore production more stable, although there are also clear advantages for a bacterium in being able to assimilate siderophores produced by other organisms, including the host (Miethke & Marahiel, 2007).

Siderophore production is regulated by iron availability as part of a complex system of iron homeostasis. The

topics of siderophore production, regulation and uptake have been extensively reviewed elsewhere (e.g. Neilands, 1993, 1995; Cakmak *et al.*, 1994; Chakraborty *et al.*, 2007), and will not be covered again herein. Interestingly, however, it has recently begun to emerge that some so-called secondary siderophores, which have much lower affinities for iron than other siderophores produced by the same organism, may be important for the acquisition of other metals, including zinc (Leach *et al.*, 2007). As will be discussed, siderophores and their regulatory systems have extensive influence on plant-pathogen interactions.

Redox active metals are not simply required for life. A delicate balance must be maintained, because these metals have the potential to become toxic at excess concentrations. Copper, for example, is able to displace other metals from complexes and to generate reactive oxygen species (ROS). Similarly, iron is a potent generator of ROS (Miethke & Marahiel, 2007), which is the necessary corollary of the redox activity that makes it so fundamentally useful. ROS may cause oxidative stress and damage to cells (Fones & Preston, 2012). The observation that the toxic metal, cadmium, kills cells by creating waves of H<sub>2</sub>O<sub>2</sub> and superoxide illustrates the damaging potential of ROS (Garnier *et al.*, 2006). Additionally, excess metals may compete with required cofactors for binding sites in transport proteins and enzymes (Stohs & Bagchi, 1995; Hanikenne, 2003). This results in a need for stringently controlled metal ion homeostasis, and mechanisms for tolerating elevated metal concentrations.

Metals are most toxic as free ions (Pollard *et al.*, 2002), so an important facet of tolerance is chelation of metal ions into complexes to reduce their toxicity. Such complexes are often sequestered into specific subcellular compartments (Küpper *et al.*, 1999; Krämer *et al.*, 2000; Cosio *et al.*, 2004). This strategy is common among plants; in barley, for example, metal toxicity is reduced by vacuolar and apoplastic sequestration (Brune *et al.*, 1994). Chelating agents such as phytochelatins and metallothioneins are also known to be involved in metal tolerance in many plants; for example, phytochelatins are essential for tolerance to cadmium in *Arabidopsis thaliana* (Fordham-Skelton *et al.*, 1998), while metallothioneins have been shown to be upregulated in response to zinc stress in *Populus alba* (Castiglione *et al.*, 2007). A metallothionein has also been implicated in cadmium and zinc tolerance in *Silene vulgaris*, but its role may be indirect, *via* copper homeostasis, rather than directly chelating zinc or cadmium (Jack *et al.*, 2007).

Metal binding proteins are similarly important in bacterial metal tolerance. For example, the *copA*, *B* and *C* genes of *P. syringae* encode copper binding proteins that are found in the periplasm and outer membrane of the

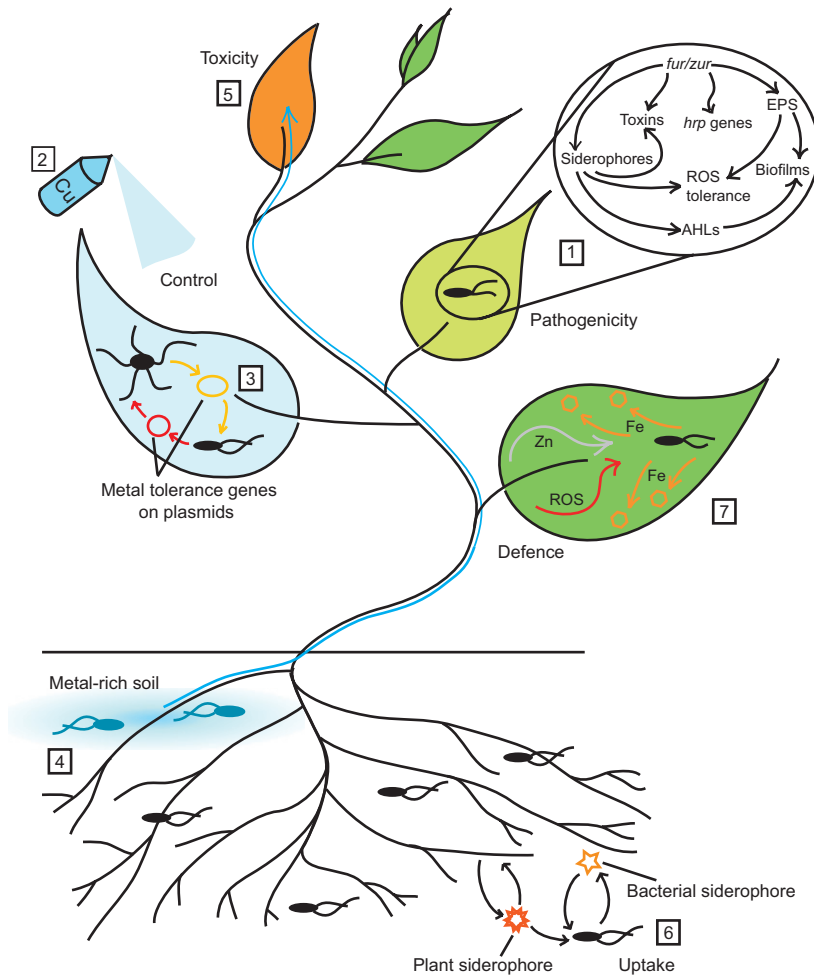

**Fig. 1.** Metals in plant-microbe interactions. Metals can influence the expression of various bacterial virulence factors, including toxins, EPS and *hrp* genes, most notably *via* signalling involving metal sensing systems including *fur* and *zur*, and metal uptake systems, particularly siderophores (1). Metals may also have roles in protecting the plant against infection and, especially in the case of copper, can be applied directly to crops as antimicrobials (2). This approach can lead to the development of metal resistant strains, accelerated by the horizontal transfer of resistance genes. Build-up of metals in the soil can affect microbial communities (4), with potential effects upon plant-microbe interactions, and can result in overexposure of the plant, causing toxicity symptoms such as russetting (5). Plants and microbes also compete for metals. Metal uptake often occurs *via* iron-chelating compounds such as siderophores, and soil-borne bacteria are frequently able to take up those produced by the plant, in addition to their own (6). Within the plant, competition for metals may also be important, with the withholding of metals, especially iron, being an important defence. Additionally, plants may use metals in defence, either as catalysts for ROS production, or more directly as antimicrobial toxins (7), as most clearly evident in the case of metal hyperaccumulating plants.

bacterium. These provide copper resistance by binding copper so effectively that the bacterial colonies can turn blue (Silver, 1996; Nies & Brown, 1998). This well characterised system is known to have parallels in many other bacteria (Cooksey *et al.*, 1990; Cooksey, 1994). Metallothioneins are also known in bacteria, having, in fact, first been discovered in the cyanobacteria *Synechococcus* (Silver, 1996). They are used particularly for zinc (Blindauer *et al.*, 2001) and also copper (Gold *et al.*, 2008). *Pseudomonas syringae* may also use histidine to bind copper (Cánovas *et al.*, 2003). Regulation of the expression of iron-binding proteins is thought to play an important role in iron homeostasis. For example, transcriptomic studies of the xylem-limited pathogen *X. fastidiosa* showed that expression of the major iron storage protein, bacterioferritin, and other proteins containing iron-sulphur clusters decreased in iron-limited conditions (Zaini *et al.*, 2008).

However, the most common strategy for metal resistance in bacteria is the efflux of excess metal from the

cell. For example, the *cueA* copper resistance gene of *Pseudomonas aeruginosa* encodes a P-type ATPase, which exports the metal (Schwan *et al.*, 2005). There are a number of well-studied metal resistance operons that enable efflux of metals from the cell. This efflux is mediated by a variety of transporters, the expression of which is regulated by metal ion sensing proteins (Busenlehner *et al.*, 2003). Efflux proteins include members of the Cation Diffusion Facilitator (CDF), Resistance-Nodulation-Cell Division (RND) and Major Facilitator superfamilies, as well as P-type and ABC ATPases (Mergeay *et al.*, 2003; Nies, 2003, 2007; Silver & Phung, 2005). There is evidence for the horizontal transfer of the genes encoding these metal-efflux systems (Mergeay *et al.*, 2003). The number of efflux pumps possessed by a bacterial species varies depending on lifestyle, with generalist bacteria typically possessing more, as they may be exposed to a greater variety of toxins. For instance, *Pseudomonas putida* and *P. aeruginosa* have twelve and ten efflux pumps, respectively, while *Escherichia coli* has four (Cánovas



*et al.*, 2003). The mechanisms of bacterial metal tolerance are summarised in Fig. 2.

Interestingly, studies have also suggested a role for metal uptake systems in reducing metal toxicity, particularly the iron toxicity associated with bacterial responses to oxidative stress. Peroxide stress has been shown to induce a variety of adaptive changes in bacteria, including changes in metal ion homeostasis such as increased expression of transporters involved in uptake of manganese and zinc. It has been speculated that increased cytosolic concentrations of these metals act to displace ferrous iron from enzyme targets, and a high Mn/Fe ratio has been correlated with oxidative stress tolerance (Faulkner & Helmann, 2011).

From the perspective of plant pathogenesis it is interesting to note that the regulation or expression of a number of metal tolerance systems alters during host-bacteria interactions. For instance, the *cueA* gene is upregulated in

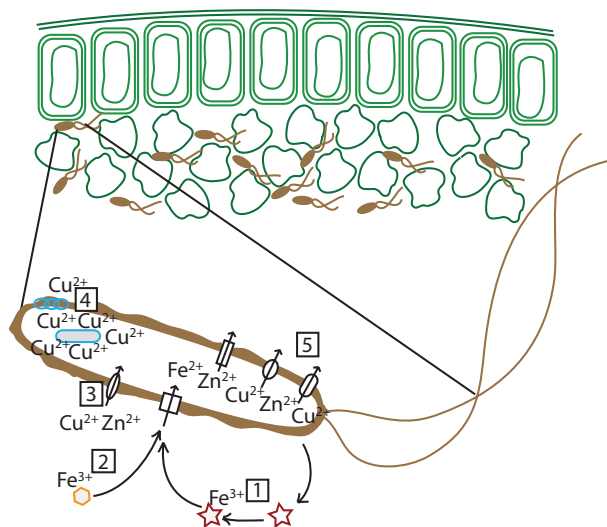

**Fig. 2.** Bacterial metal uptake and homeostasis. Iron is often limiting in plant-associated environments. Iron-chelating compounds such as siderophores are produced to maximise uptake (1). Bacterial pathogens may also be able to obtain iron from host iron-chelating compounds such as ferritins, which may function to restrict iron availability to the pathogen (2). Metals such as zinc and copper are imported by membrane transporters (3). The presence of high concentrations of individual metals in the environment may restrict uptake of other essential metals through competition for metal ion binding sites in transport mechanisms. Toxic excesses of metal ions are often tolerated through chelation and sequestration, either by compounds within the EPS, periplasm or outer membrane, such as the CopABC copper binding system of *Pseudomonas syringae*, or compounds such as metallothioneins, found within the cell (4). The final and frequently most important layer of defence employed by bacteria against toxic excesses of metals is efflux from the cell (5), mediated by a number of types of membrane transporter including P-type and ABC ATPases, as well as CDF-, RND- and major facilitator family proteins.

the plant growth promoting rhizobacterium *Pseudomonas fluorescens* SBW25 when growing on the surface of sugar beets (Zhang & Rainey, 2008), and it has been found that this gene is important for colonisation of plant hosts (Zhang & Rainey, 2007). The *copRSCD* genes present in a strain of *P. fluorescens* isolated from a diseased fish have been implicated in spread and survival in host tissues, as well as copper resistance (Hu *et al.*, 2009). In plants as well, metal resistance systems appear to play a role during interactions with pathogens. For instance, metallothioneins are known to be upregulated in *Arabidopsis*, tobacco and velvetleaf during infection (Dauch & Jabaji-Hare, 2006), while phytochelatin synthesis has been linked to basal defence responses (Clemens & Peršoh, 2009). This interplay between metal usage, metal stress and plant-pathogen interactions will be explored in more detail in the following sections of this review.

## Metal-dependent regulation of virulence

### *Fur* and *zur*: metal sensing in virulence

There are a number of ways in which metals can influence the ability of a micro-organism to be pathogenic on a plant host. Their most obvious impact is in terms of metal availability to support bacterial growth in plant tissues. However, metals can also be involved in the regulation of pathogenesis and virulence genes, both directly and indirectly (Fig. 1). An important example of this is the transcriptional regulator, *fur*. *fur* controls the expression of iron uptake and iron storage systems in an iron-dependent manner (McHugh *et al.*, 2003; Butcher *et al.*, 2011). The mode of action of the Fur protein has been well studied in *E. coli*, where it is known to form a complex with  $Fe^{2+}$ , which binds to a 'fur box' sequence in the promoter of various genes. In the absence of iron, Fur cannot bind and repression of transcription of these genes is released (Bagg & Neilands, 1987). As well as this negative regulation, Fur can activate genes by repressing the transcription of the small RNA, RyhB, which, when expressed, causes degradation of mRNAs encoding iron-utilising enzymes (Massé & Gottesman, 2002). However, the role of Fur is not restricted to effects upon iron metabolism. Instead, Fur behaves as a global regulator of gene expression, with involvement in acid tolerance, oxidative stress tolerance, toxin production and the expression of virulence factors (Kitphati *et al.*, 2007), making iron and *fur* critical for pathogenesis (Ratledge & Dover, 2000).

Unsurprisingly, *fur* mutants have been found to have reduced virulence and pathogenicity. For example, a *fur* mutant of *P. syringae* pv. tabaci 11528, the causal agent

of wildfire disease of tobacco, was found to have reduced virulence and population growth *in planta*, which may be linked to *fur* regulation of iron uptake and siderophore synthesis, but may also be linked to reduced production of the toxin, tabtoxin, in *fur* mutants (Cha *et al.*, 2008). Tabtoxin is a monocyclic  $\beta$ -lactam, which is cleaved in a zinc-dependent manner (Durbin & Uchytel, 1985; Levi & Durbin, 1986) in plant cells to generate the toxin tabtoxin- $\beta$ -lactam (T $\beta$ L). T $\beta$ L inhibits glutamine synthesis by glutamine synthetase, which may cause chlorotic symptoms due to the build-up of ammonia (Barta *et al.*, 1992; Bender *et al.*, 1999). Similarly, a spontaneous *fur* mutant of *Xanthomonas campestris* pv. *campestris* was reported to show high intracellular iron, reduced virulence and increased sensitivity to ROS (Jittawuttipoka *et al.*, 2010). In some bacteria, including the plant symbionts *Rhizobium leguminosarum* and *Sinorhizobium meliloti*, *fur* has been found to regulate manganese uptake, while losing its role in iron homeostasis (Johnston *et al.*, 2007). This is also the case in the tumour-inducing pathogen *Agrobacterium tumefaciens*, where the gene is renamed *mur*. Despite regulating a different metal, *mur* remains essential for full virulence (Kitphati *et al.*, 2007).

A homologue of *fur*, named *zur*, has been discovered which controls zinc homeostasis by repressing zinc uptake and up-regulating zinc efflux (Hantke, 2001, 2005; Huang *et al.*, 2008). *Zur* behaves as a zinc responsive global transcription regulator, and, like *fur*, can be shown to be involved in pathogenicity and virulence. A *zur* mutant of *Xanthomonas oryzae* grows slowly in both rich medium and in rice leaves, and shows reduced virulence on rice (Yang *et al.*, 2007). A *zur* knock-out mutant in the related bacterium *X. campestris* shows reduced zinc tolerance and reduced virulence (Tang *et al.*, 2005). It is possible, however, that the virulence effect in this instance may be attributable to the fact that the mutant produces lower quantities of extracellular polysaccharides (EPS), which are important for virulence (Yu *et al.*, 1999; Fones & Preston, 2012).

It has been shown that *zur* is involved in the regulation of *hrp* (hypersensitive response and pathogenicity) genes in *X. campestris* (Huang *et al.*, 2009). This provides a direct link between this gene and the pathogenicity of the bacterium: the *hrp* genes, in concert with genes named 'hypersensitive response conserved' (*hrc*) produce the 'syringe-like' type three secretion system (T3SS) (Alfano & Collmer, 1997; Collmer *et al.*, 2000) through which 'effector' proteins are injected into host cells to enhance pathogenicity (Preston, 2000; Grant *et al.*, 2006). Additionally, *fur* is known to regulate the expression of T3SS genes in animal pathogens such as *Salmonella enterica* (Ellermeier & Schlauch, 2008), suggesting that this link between metal regulation and the expression of the *hrp*

cluster is unlikely to be confined to *Xanthomonas*. Indeed, it is known that iron nutrition can affect *hrp* gene expression in *P. syringae* (Bronstein *et al.*, 2008; Kim *et al.*, 2009, 2010). Other plant colonisation and virulence factors shown to be regulated by iron include type IV pili in *X. fastidiosa* (Zaini *et al.*, 2008) and exoenzyme production in soft rot pathogens such as *Dickeya dadantii* (Franza *et al.*, 2002).

## Siderophores: metal binding in virulence

Links between siderophore production and pathogenesis have been clearly demonstrated in mammalian systems, in which it is understood, for example, that the siderophore yersiniabactin is essential for the pathogenicity of *Klebsiella* and *Yersinia pestis* and pyoverdine for *P. aeruginosa* on mouse hosts (Meyer *et al.*, 1996; Bearden *et al.*, 1997; Lawlor *et al.*, 2007). In plants, a large body of work performed by Expert and coworkers using the model system of *Erwinia chrysanthemi* (now renamed *D. dadantii*) and *Saintpaulia ionantha* has provided much of our current knowledge in this area, demonstrating a clear link between siderophore production and pathogenicity in this model system (Enard *et al.*, 1988; Expert, 1999). *Dickeya dadantii* produces two kinds of siderophore involved in high-affinity Fe uptake: achromobactin and chrysobactin. Both are needed for survival and full virulence *in planta* (Expert, 1999). The importance of these siderophores in mediating plant-microbe competition for iron can be illustrated by the finding that chrysobactin production by *D. dadantii* leads to iron deficiency in the plant host, as measured by the amount of iron bound to plant ferritins (Neema *et al.*, 1993).

In addition to those of *D. dadantii*, siderophores of related enterobacteria have been extensively studied. *Erwinia carotovora* (now *Pectobacterium carotovorum*) produces the high-affinity hydroxamate siderophore, aerobactin (Ishimaru & Loper, 1992), and a high-affinity class of siderophores, desferriodioxamines, is conserved among *Erwinia* and *Pantoea* species (Smits & Duffy, 2011). *Erwinia amylovora* infects the blossoms of pear and apple trees, which are known to provide an iron-limited environment (Temple *et al.*, 2004), a fact that supplies a possible role for these conserved high-affinity siderophores.

The transcriptional regulator Fur, discussed in the preceding section, regulates siderophore synthesis in many plant pathogenic bacteria, including *D. dadantii* (Franza *et al.*, 2005), *P. syringae* pv. *tabaci* (Cha *et al.*, 2008) and *P. syringae* pv. *tomato* (Jones *et al.*, 2007). Although *fur* mutants generally show constitutive siderophore production, it is interesting to note that nonlethal Fur missense mutants of *P. aeruginosa* have been reported to show con-

stitutive synthesis of the siderophores pyochelin and pyoverdine, but reduced iron uptake (Hassett *et al.*, 1996), which may provide one explanation for the reduced ability of some *fur* mutants to grow in the host environment. However, as noted above, *fur* does not regulate siderophore synthesis in all bacteria. A *mur (fur)* mutant of the tumorigenic plant pathogen *A. tumefaciens* did not show altered siderophore synthesis, although it did show increased manganese uptake, reduced virulence, reduced growth in iron-limiting conditions and increased sensitivity to oxidative stress (Kitphati *et al.*, 2007).

Evidence of a role for siderophore synthesis and iron uptake in the pathogenesis of *P. syringae* was suggested in work by Bronstein *et al.* (2005), which showed that mutants of *P. syringae* pv. *tomato* DC3000 lacking the twin-arginine translocation (*tat*) system had reduced siderophore synthesis, reduced iron uptake and decreased virulence. More direct evidence was provided by a study showing that siderophore-deficient mutants of *P. syringae* pv. *tabaci* were impaired in their ability to infect tobacco (Taguchi *et al.*, 2010). *Pseudomonas syringae* pv. *tomato* produces two siderophores, yersiniabactin and pyoverdine, and is also able to use citrate as an iron chelator (Buell *et al.*, 2003; Jones *et al.*, 2007; Jones & Wildermuth, 2011). However, siderophore-deficient mutants of *P. syringae* pv. *tomato*, although impaired in iron uptake *in vitro*, remained fully pathogenic in tomato. Similarly, siderophore mutants of the bean pathogen *P. syringae* pv. *phaseolicola* 1448A and the sweet cherry pathogen *P. syringae* pv. *syringae* B301D were shown to retain virulence when inoculated into bean pods and cherry fruit, respectively (Cody & Gross, 1987; Owen & Ackerley, 2011). Studies of a number of other plant pathogenic bacteria, including the rice pathogen *X. oryzae* pv. *oryzae*, the gram-positive plant pathogen *Streptomyces scabies*, the wilt pathogen *Ralstonia solanacearum* and *A. tumefaciens* have also failed to demonstrate a role for siderophore synthesis in plant pathogenesis (McQueen & Schottel, 1987; Bhatt & Denny, 2004; Rondon *et al.*, 2004; Pandey & Sonti, 2010; Seipke *et al.*, 2011).

Several explanations have been put forward to explain why siderophore-deficient mutants of some plant pathogenic bacteria remain fully virulent in plant hosts. It has been suggested that pathogens are able to acquire iron from plant iron compounds such as heme/hemin or iron-nicotianamine, or that iron levels in plant tissues are sufficient to support pathogen growth in the absence of siderophore synthesis (Bhatt & Denny, 2004; Jones & Wildermuth, 2011). Iron complexes with phytic acid (myo-inositol hexakisphosphate, InsP6) and other myo-inositol trisphosphate and tetrakisphosphate regio-isomers have also been suggested to be a source of iron for plant pathogenic bacteria (Smith *et al.*, 1994; Hirst *et al.*,

1999). Genome sequence analyses have revealed a greater degree of functional diversity and functional redundancy in many plant pathogens than previously anticipated, with pathogens such as *P. syringae* pv. *actinidiae* containing genes for the production of multiple siderophores, including pyoverdine, enterobactin and yersiniabactin (Scortichini *et al.*, 2012). Finally, it has been suggested that some of these bacteria have novel iron chelation systems that act as alternative mechanisms for iron uptake in the absence of siderophore synthesis. For example, Grinter *et al.* (2012) have recently shown that two ferredoxin containing bacteriocins produced by the soft rot pathogen *P. carotovorum* can enhance bacterial growth in the presence of spinach ferredoxin under iron-limiting conditions, suggesting that plant ferredoxins can be used as an additional source of iron. The activity of iron chelation systems may be enhanced by the activity of compounds such as phenazine-1-carboxylic acid, produced by the opportunistic pathogen *P. aeruginosa*, which can act to reduce Fe<sup>3+</sup> to Fe<sup>2+</sup> increasing iron availability in host tissues (Wang *et al.*, 2011).

Despite the lack of evidence for a role for siderophore synthesis in the growth of many plant pathogenic bacteria inside plant tissues, siderophores have been shown to have an important role in the earliest stages of the *P. syringae* infection cycle. *Pseudomonas syringae* pv. *syringae* B728a and *P. syringae* pv. *phaseolicola* 1448A produce two siderophores, pyoverdine, in common with *P. syringae* pv. *tomato* and other pseudomonads, and achromobactin, in common with *D. dadantii* (Berti & Thomas, 2009; Owen & Ackerley, 2011). Mutants of the epiphytic strain *P. syringae* pv. *syringae* 22d/93 deficient in either pyoverdine or achromobactin synthesis showed reduced epiphytic growth on soybean leaves when spray inoculated onto the leaf surface, with a double mutant lacking both siderophores showing an even greater reduction in growth (Wensing *et al.*, 2010). This reduction was not evident when bacteria were wound inoculated into leaves, indicating that wound sites leaked sufficient iron to support bacterial growth. It is interesting to note that for opportunistic pathogens such as *P. aeruginosa* and *B. cenocepacia* the requirement for siderophore synthesis differs between plant and animal hosts, with siderophores playing a more central role in animal models of infection. For example, pyoverdine and ornibactin-deficient mutants of *B. cenocepacia* showed only a slight reduction in the ability to infect alfalfa, but were strongly attenuated in their ability to infect *Galleria mellonella* and *Caenorhabditis elegans* (Uehlinger *et al.*, 2009). It has been shown that some plant pathogenic bacteria, including *P. syringae*, *Pantoea stewartii* and *D. dadantii* can be disseminated by insect vectors such as aphids (Grenier *et al.*, 2006; Stavrinides *et al.*, 2009, 2010), and it is possible that siderophore-mediated iron

uptake plays an important role in these interactions. Finally, it is also important to note that there may be counter-selection against the use of certain siderophores during plant colonisation, as the pseudomonad siderophore pyoverdine can be recognised and assimilated by *Arabidopsis*, thus both alerting the plant to the presence of the invader and providing it with an iron source (Vansuyt *et al.*, 2007). Indeed, the enterobactin genes of closely related *P. carotovorum* strains have been shown to be highly polymorphic (Bull *et al.*, 1994), suggesting selection for diversity among these enzymes and their products, which may be driven by plants or other microorganisms.

Beyond their role in iron acquisition, siderophores are implicated in the regulation of many essential virulence functions; for example, pyoverdine can, *via* the TonB-dependent siderophore receptor, induce both itself and the important virulence factors exotoxin A and endoprotease in *P. aeruginosa* (Vasil, 2007). *Pseudomonas syringae* pv. *tabaci* mutants deficient in pyoverdine synthesis were found to be deficient in production of tabtoxin and EPS, and to show severely reduced virulence following both infiltration and spray inoculation (Taguchi *et al.*, 2010). Greenwald *et al.* (2012) used RNAseq analysis to show that the extracytoplasmic sigma factor AcsS regulates achromobactin synthesis in *P. syringae* pv. *syringae* B728a, and found that AcsS-deficient mutants showed altered expression of 287 genes, including genes associated with motility, toxin synthesis and EPS synthesis.

*Dickeya dadantii* seems to be relatively unusual in requiring full siderophore functionality for growth in plant tissues; neither *P. syringae* pv. *tomato*, *P. aeruginosa*, *A. tumefaciens* nor even the more closely related *P. carotovorum* show compromised virulence or growth *in planta* when their siderophore synthesis systems are mutated (Leong & Neilands, 1981; Ishimaru & Loper, 1992; Jones *et al.*, 2007; Nadal Jimenez *et al.*, 2010; Jones & Wildermuth, 2011). One possibility is that siderophores might be used *in planta* to help protect *D. dadantii* from oxidative stress caused by excess iron released during tissue maceration (Expert *et al.*, 1996), explaining why multiple siderophores are of greater importance in this soft rot pathogen than in more biotrophic pathogens. Consistent with this, Boughammoura *et al.* (2008) found that strains of *D. dadantii* lacking the main iron storage ferritin FtnA showed increased sensitivity to oxidative stress and reduced virulence *in planta*. Both oxidative stress and iron regulate siderophore production in the plant-associated bacterium *Azotobacter vinelandii*, suggesting that here, too, siderophores might function to protect the bacterium from oxidative stress induced by excess iron (Tindale *et al.*, 2000). However, as noted earlier, in *D. dadantii*, several genes involved in infection, including

pectinases essential for soft rot symptoms, are also controlled *via* iron availability, and siderophores are directly implicated in modulation of plant signal transduction pathways to promote bacterial growth, creating a far more complex picture than simply the use of siderophores to 'mop up' excess iron (Franza *et al.*, 2002; Dellagi *et al.*, 2009). The iron-binding activity of chrysoactin and deferrioxamine have been shown to induce salicylic acid signalling in *Arabidopsis*, thereby antagonising jasmonate signalling and impairing plant defences (Dellagi *et al.*, 2009).

The challenge of untangling the links between iron uptake and oxidative stress can be further illustrated by work on the iron regulators RirA and IrrA in *A. tumefaciens*. RirA is a repressor of iron uptake and siderophore synthesis and *rirA* mutants produce increased levels of siderophore and take up excess iron in iron-sufficient media, resulting in increased sensitivity to ROS and reduced virulence gene expression (Ngok-Ngam *et al.*, 2009). IrrA is regulated by degradation when bound to iron-containing heme, and represses expression of *rirA*. As might be expected, a mutant lacking *irrA* contains decreased iron, and shows increased ROS tolerance. However, a double *rirA irrA* mutant has slightly increased iron and decreased ROS tolerance (Hibbing & Fuqua, 2011). The authors of this study speculate that this discrepancy in the correlation between iron concentrations and ROS tolerance could be explained if IrrA acted as a negative regulator of a ROS defence mechanism. Another example of cross-talk between iron uptake and oxidative stress mechanisms in plant pathogenic bacteria has been reported in *P. syringae* pv. *tomato*, in which genes associated with siderophore synthesis were found to be co-regulated with azurin, a periplasmic protein predicted to be associated with responses to oxidative stress (Swingle *et al.*, 2008).

## Metals and siderophores in bacterial quorum sensing and virulence

When considering the diverse roles of siderophore synthesis in plant pathogenesis, it is interesting to note that in some bacteria siderophore-deficient mutants have been shown to produce reduced levels of acyl-homoserine lactones (AHLs), signals that are known to be important in bacterial quorum sensing (Dong *et al.*, 2001). A reciprocal observation is that quorum sensing-deficient mutants of *P. aeruginosa* produce reduced levels of the siderophore pyoverdine (Stinzi *et al.*, 1998). Quorum sensing is important for the virulence of many bacterial pathogens and also controls the formation of biofilms (Williams *et al.*, 2000; Waters & Bassler, 2005). The importance of biofilms for pathogen survival is particularly well-studied



in the case of human pathogens (e.g. Parsek & Singh, 2003). Under the control of quorum-sensing systems, iron can influence biofilm formation, leading to a connection between loss of siderophore synthesis and reduced virulence for *P. aeruginosa* PAO1 (Banin *et al.*, 2005; Diggle *et al.*, 2007). Consequently, iron chelators are currently being explored as therapeutic agents to limit *P. aeruginosa* infection (Moreau-Marquis *et al.*, 2009; Hurley *et al.*, 2012).

Recently, parallels have been found in plant pathogens, showing that siderophore production and iron-based regulation of quorum-sensing genes can also be important for biofilm formation and virulence *in planta* (Cha *et al.*, 2008; Taguchi *et al.*, 2010). An intriguing example of the links between iron availability, quorum sensing and virulence was reported by Dulla *et al.* (2010), who found that the ability of epiphytic bacteria to inhibit quorum sensing in *P. syringae* strongly correlated with their ability to compete for iron with *P. syringae* through the production of iron-chelating siderophores. However, co-inoculation of these iron/quorum sensing-limiting strains with *P. syringae* increased the number of disease lesions. Experiments using nonmotile *P. syringae* indicated that this increased virulence could be due to an increase in motility in iron-limited conditions. Additionally, Cha *et al.* (2008) found that AHL synthesis is suppressed in the *fur* mutant of *P. syringae* pv. *tabaci*, indicating that a similar link between iron levels and quorum sensing may exist in this bacterium. These studies, together with studies discussed in previous sections, support the idea that there are two distinct phases to *P. syringae* infection, an epiphytic phase in which iron is limited and quorum-sensing signals are present in low concentrations, promoting motility towards stomata and wounds, and an endophytic phase in which iron is more available, quorum-sensing signals increase, and bacteria switch from planktonic to sessile growth.

In *P. aeruginosa*, Bollinger *et al.* (2001) have shown that iron limitation induces SOD, an essential part of the bacterium's response to ROS stress, in a manner dependent upon quorum-sensing systems, which may promote *in planta* survival and thus pathogenicity. At low iron concentrations, *P. aeruginosa* has also been shown to express an acylase, PvdQ, which degrades AHLs (Nadal Jimenez *et al.*, 2010), thus quenching the quorum signal. The expression of *pvdQ* is essential for biofilm formation, swarming motility and full virulence under low iron conditions. AHL acylases similar to *pvdQ* are also present in genome-sequenced strains of *P. syringae*, providing a potential mechanism linking iron availability with quorum sensing in this pathogen. Consistent with this, a strain of *P. syringae* pv. *syringae* B728a lacking two AHL acylases named HacA and HacB was found to be deficient

in siderophore production and to exhibit a distinctive colony morphology (Shepherd & Lindow, 2009).

Links between iron availability and quorum sensing are not limited to AHL-based quorum-sensing systems. The *rpfB* gene of *X. fastidiosa*, which encodes a long chain fatty acid coenzyme A ligase important in the production of diffusible signal molecules by xanthomonads and *Xylella*, was found to be down-regulated in response to both excess iron and iron-limiting conditions (Zaini *et al.*, 2008).

Intriguingly, considering these links between iron, quorum sensing and virulence, it appears that there may also be a role for siderophores and redox active phenazines such as pyocyanin in cell-cell communication in some plant pathogenic bacteria. In *P. aeruginosa*, pyoverdine is involved in the regulation of secreted virulence factors and of itself. At low iron, the secretion of pyoverdine is increased, and the secreted siderophore is then able to regulate virulence factor expression in other bacteria by which it is taken up (Lamont *et al.*, 2002; Beare *et al.*, 2003). Pyocyanin induces expression of efflux pumps and the iron storage protein bacterioferritin, but downregulates certain genes associated with ferric iron uptake and zinc uptake, including genes involved in siderophore-mediated iron uptake and signal transduction (Dietrich *et al.*, 2006; Shirley & Lamont, 2009). As discussed above, the AcsS sigma factor of *P. syringae* pv. *syringae* B728a regulates the synthesis and secretion of the siderophore achromobactin, but also the iron response, EPS production and motility of these bacteria (Greenwald *et al.*, 2012). It would therefore be of great interest to know whether achromobactin can itself influence the expression of AcsS in a manner parallel to the auto-regulation of pyoverdine, and whether similar regulatory mechanisms exist for other siderophores produced by plant pathogenic bacteria, with iron availability acting not only as a property of the host environment, but also an indicator of the number of competing con-specifics in that environment.

### Additional roles for metals in pathogenicity

Iron is not the only metal involved in regulating virulence gene expression. In the potato pathogen, *S. scabies*, zinc is known to regulate the expression of esterase, an important enzyme for the virulence of this bacterium (McQueen & Schottel, 1987; Schottel *et al.*, 1992). There are also other potential roles for metals in pathogenesis. Bacterial NRAMP manganese transporters are known to be important for virulence, but their precise role is not known (Papp-Wallace & Maguire, 2006). Similarly, a copper transporter is necessary for the pathogenicity of the fun-

gal phytopathogen *Colletotrichum gloeosporioides*. In this case, the copper is required by the pathogen for the production of copper-SOD in order for the pathogen to tolerate ROS produced during the plant's defence response, but also for fungal spore germination (Barhoom *et al.*, 2008). *Pseudomonas syringae* strains also possess a Cu-Zn-SOD, which is absent from most nonpathogenic pseudomonads, along with a Mn-SOD and Fe-SOD that are more broadly conserved (Fones & Preston, 2012). All three SODs are predicted to have a periplasmic location, placing these metal-dependent enzymes in the front line of defences against oxidative stress. Also important in protecting the pathogen from ROS stress is the aconitase enzyme of *X. campestris* pv. *vesicatoria*, an iron-sulphur protein that is involved in the TCA cycle, and also in sensing of iron and reactive oxygen. Mutants lacking functional aconitase are more susceptible to superoxide toxicity, and show impaired *in planta* growth and symptom development on pepper (Kirchberg *et al.*, 2012). One of the most direct links between metal and pathogenicity is in the alfalfa pathogen, *Corynebacterium insidiosum*, which has been found to produce a copper-containing phytotoxic glycopeptide that induces wilt by blocking xylem vessels (Ries & Strobel, 1972).

In some cases it may be necessary for a pathogen to resist high concentrations of metal in the host. A well-studied example of this is the human pathogen *Helicobacter pylori*, which requires metal-efflux systems providing resistance to cadmium, zinc and nickel to colonise the human stomach (Stähler *et al.*, 2006). There is also evidence that plant disease symptoms can be associated with increased or unbalanced metal concentrations in plant tissues, which may lead to a requirement for increased metal tolerance in plant pathogens. For example, high levels of iron, zinc and manganese have been recorded in chlorotic leaves of citrus plants infected with *X. fastidiosa* (Silva-Stenicio *et al.*, 2009). The following sections consider the various ways in which metal resistance can be important for plant pathogens.

## Use of metals in disease control

The fact that metals can behave as toxins when present in excess means that they can be used as protective, anti-microbial agents in agriculture. For instance, copper is part of a fungicide application known as 'Bordeaux mixture', used in orchards and vineyards since the 19th century to guard these crops against mildew (Russell, 2005). Indeed, Bordeaux mixture, commercialised after its accidental discovery by Milardet in the 1880s, represents the first large scale use of fungicide (Floyd, 1991), although copper is recorded as being used as a protectant for cereal crops as long ago as 1761 (Van Zweiten

*et al.*, 2007). Today, copper-based fungicides remain popular, largely because they are one of the few permitted anti-microbial applications in organic farming. A recent report conducted by the Australian government listed an impressive diversity of crops, from macadamia nuts to cucumber to mangoes, of which a variety of diseases including leaf spot, late blight, canker, anthracnose and mildew are treated with copper-based fungicides (Van Zweiten *et al.*, 2007). Copper is often one of a very limited number of options available for bacterial disease control, and in Florida, frequent use of copper sprays for control of canker has increased since the citrus canker eradication programme was suspended in 2006 (Behlau *et al.*, 2011).

There are, however, a number of problems with the use of copper as a crop protectant. Firstly, copper is not only toxic to pathogens, but is also phytotoxic, and, when used excessively, causes russetting of fruits (Montag *et al.*, 2006). An additional concern is that copper-based products can build up in soils where they are used over long periods, eventually becoming toxic to the crops they are intended to protect. This is a particular problem in viticulture and in orchard settings (Rusjan *et al.*, 2007). Copper in soil can also have a detrimental effect on mycorrhizal symbionts (Van Zweiten *et al.*, 2007). When used in the treatment of citrus canker, copper has been shown to induce a viable but nonculturable state in *Xanthomonas axonopodis* pv. *citri*, potentially creating a reservoir of the pathogen in the soil (del Campo *et al.*, 2009). Copper has also been reported to induce expression of the virulence-associated Xcs (type II) secretion system in *X. axonopodis* pv. *citri* (Palmieri *et al.*, 2010). As a result, methods are being developed to minimise the use of copper in these crop systems (Kuflik *et al.*, 2009) and the European Union has considered a ban on the use of copper-based pesticides and fungicides due to their environmental persistence (Houlton, 2009).

Another concern, from the perspective of disease control, is the problem of pathogen resistance to metals, which often develops as the result of prolonged exposure. The development of copper resistance has been well documented. For example, Bordeaux mixture is used widely in Portugal and Spain to treat apical necrosis of mangoes, caused by *P. syringae* pv. *syringae* (Cazorla *et al.*, 2002). The efficacy of this treatment is declining, in common with that of copper-based treatments of other diseases caused by pseudomonads and xanthomonads (Schenk & Pscheidt, 1998). Resistant strains of both species have been discovered (Marco & Stall, 1983; Andersen *et al.*, 1991) and there is evidence that extensive horizontal transfer of the copper resistance determinants, which are largely plasmid borne (Sundin *et al.*, 1989) occurs, both among pseudomonads and between pseudomonads and

xanthomonads (Voloudakis *et al.*, 1993). This process can be rapid, with newly resistant strains appearing within 1 year of the application of Bordeaux mixture to mango crops (Cazorla *et al.*, 2002). In Japan, strains of *P. syringae* pv. *actinidiae*, the causal agent of bacterial canker of kiwi fruit, were found to have *copA* and *copB* genes at the onset of disease outbreaks, but following repeated treatment with copper-based bactericides strains were also found to have acquired *copS* and *copR* (Nakajima *et al.*, 2002). Furthermore, when copper is used in concert with the antibiotic streptomycin, a common strategy to prevent tip-dieback disease, resistance to both of these anti-microbials can quickly become linked in pathogenic pseudomonads (Sundin & Bender, 1993).

Interestingly, despite the long-term use of copper as an antimicrobial, its mode of action has not been fully elucidated. One recent study determined that toxicity towards the fungus *Venturia inaequalis* does not occur as a result of external ROS production, but requires that the copper be taken up by the organism (Montag *et al.*, 2006). It is known that contact with copper surfaces can be bactericidal, causing loss of membrane integrity, DNA damage and respiratory inhibition (Grass *et al.*, 2011; Warnes *et al.*, 2011). The exact mechanism underlying this appears to vary depending upon the bacterial species, although ROS are known to be involved (Warnes *et al.*, 2011). It has also been proposed that copper sulphate is lethal to *E. amylovora* through enzyme inhibition severe enough to prevent growth and promote autolysis (Geider, 1999). What is understood is that copper resistant pathogens have a number of different mechanisms for tolerating the metal. One is the over-production of oxalate, which complexes with copper to form a harmless precipitate (Clausen & Green, 2003). The *Pseudomonas* and *Xanthomonas* strains discussed above possess several different resistance determinants (Cazorla *et al.*, 2002) and it has been speculated that these may have roles in addition to copper tolerance, contributing to the persistence of copper resistance in the absence of copper use. This is the case for a copper resistance gene in *Aeromonas*, which is known to also function as a pathogenicity gene (Francki *et al.*, 2000).

Although used to a lesser degree than copper, zinc is also used as an anti-microbial which can be applied to crops; for example, zinc has been shown to prevent fungal spore germination *via* the production of toxic levels of ROS (Montag *et al.*, 2006), while zinc sulphate and zineb (zinc ethylene bisdithiocarbamate) were found to inhibit growth of the bacterial pathogen *X. campestris* pv. *vesicatoria* (Adaskaveg & Hine, 1985). However, again there is evidence that strains can rapidly become resistant to zinc compounds (Adaskaveg & Hine, 1985; Fones *et al.*, 2010). Copper, streptomycin and zinc compounds have been used in combination to control bacterial plant disease,

and there is evidence that bacteria can acquire resistance to all three compounds (Ward & O'Garro, 1992).

## Metals in plant defence

The involvement of metals in plant defence is not restricted to their artificial application in agricultural systems: as already discussed, metals are an integral component of living systems and thus play a number of roles in plant defence. There are several ways in which plants use or rely on metals to influence the outcome of infection. Firstly, plants may disrupt the pathogen's supply of essential metals (Bullen, 1981; Hammer & Skaar, 2012). Secondly, the plant may attempt to overwhelm the pathogen's metal homeostasis and tolerance mechanisms by oversupplying a potentially toxic metal (Fones *et al.*, 2010; Yuan *et al.*, 2010). There are a number of metalloenzymes that are important for plant defence (Wu *et al.*, 2011), meaning that the availability of these metals to the plant can be an important factor in the outcome of the plant–pathogen interaction. Metal-induced ROS have a number of important roles both in defensive signalling and as antimicrobials (eg Wojtaszek, 1997). Finally, metal stress, either as deficiency or excess, can act as a 'priming' stimulus for plant defence, *via* the overlapping pathways by which plants signal biotic and abiotic stress (Mithöfer *et al.*, 2004).

Graham (1983) states that the balance of an interaction between plant and pathogen can be tipped by changes in micronutrition, especially when the plant is deficient in, or has access to excess levels of, a trace element. This may be most important in cases where the pathogen has not had the opportunity to co-evolve with the plant; for example when it has newly arrived in the plant's environment. Such a pathogen would, of course, be likely to lack tolerance mechanisms for the lack or excess of an element, allowing the plant to turn this contingency to its advantage.

## Withholding of metals in defence

The disruption of the pathogen's supply of metal is an obvious strategy for disease resistance, considering that microorganisms and host organisms are in competition for metal ions (Bullen, 1981; Hammer & Skaar, 2012). Thus it is to the plant's advantage to ensure that metals are diverted from the pathogen to plant cells (Fig. 1). In this context, the most relevant metal to consider is iron. Iron is one of the most abundant elements in the world (Expert *et al.*, 1994), but in aerobic environments it mostly exists as the insoluble  $\text{Fe}^{3+}$  ion, so that its bio-availability is comparatively low (Touati, 2000). This makes iron one of the most intensely competed ions during host–pathogen interactions (Payne, 1993; Weinberg,

1993; Johnson, 2008; Nairz *et al.*, 2010). The host strategy of withholding iron to limit pathogen growth has been particularly well documented in mammalian systems (Bezkorovainy, 1981; Ward & Connelly, 2004; Nairz *et al.*, 2010). Iron withholding *via* sequestration by storage proteins such as transferrin and lactoferrin is common in vertebrates and invertebrates, and can be effective, as iron is needed for bacterial growth, pathogenicity and biofilm formation (Ong *et al.*, 2006). The last of these is of great importance clinically, as the restriction of pathogen iron supply by lactoferrin can prevent necessary signalling for the development of drug-resistant biofilms (Singh *et al.*, 2002; Banin *et al.*, 2005).

More recently, evidence has been uncovered that indicates that plants also employ a strategy of pathogen iron-deprivation. In plants, a ferredoxin-like protein has been demonstrated to be involved in defence against *P. syringae* pv. *tomato* DC3000, *X. campestris* and *D. dadantii*, a pathogen known to depend on iron scavenged from host tissues during the progression of soft rot disease, as discussed previously. The defensive function of this protein was found to rely on its ability to bind iron (Huang *et al.*, 2006). Perhaps inevitably, there are also iron-binding proteins produced by pathogens, so that the final outcome depends on the interaction between host and pathogen iron-chelating agents (Boughammoura *et al.*, 2007). *Arabidopsis* has been found to upregulate ferredoxin in response to the detection of iron-uptake siderophores from pathogens (Dellagi *et al.*, 2005). Other chemicals that may be used to bind and withhold iron from pathogens include polyphenols, shown to be effective against *D. dadantii* mutants with reduced iron-uptake capacity (Mila *et al.*, 1998), and to inhibit the growth of *P. syringae* pv. *syringae* B728a on leaf surfaces (Karamanoli *et al.*, 2011).

More evidence for the importance of iron withholding in plant–pathogen interactions comes from investigations into the role of NRAMP metal transporting proteins in *Arabidopsis*. These proteins are, again, known from mammalian systems where they appear to have a role in regulating the concentrations of iron, zinc and manganese to which pathogens are exposed within macrophages (Gunshin *et al.*, 1997; Forbes & Gros, 2001; Goswami *et al.*, 2001). NRAMPs occur throughout the diversity of life and have recently been characterised in plants, including *Arabidopsis*, where they have been shown to function as uptake pumps for iron and manganese (Curie *et al.*, 2000). Certain of these NRAMPs are upregulated under biotic stress and iron starvation, and NRAMP3 and 4 have been found to be involved in basal resistance to *D. dadantii* in a manner independent of other defence-associated signals such as salicylic acid and jasmonate (Segond *et al.*, 2009). As noted previously, there is evidence that in some interactions pathogen invasion causes

iron starvation, and the presence of bacterial siderophores can induce the iron storage protein FER1 (Dellagi *et al.*, 2005; Boughammoura *et al.*, 2007). Thus, bacteria-induced iron deficiency may provide the link between NRAMP proteins and defence. Additionally, it was found that a double knockout mutant, *nramp3nramp4*, has an attenuated oxidative burst, providing the suggestion that these transporters might be involved in providing Fe<sup>3+</sup> for Fenton reactions (See Box 1) for the generation of ROS (Segond *et al.*, 2009).

Iron is not the only metal which may be withheld as a form of defence. In mammalian systems, the protein calprotectin is used by neutrophil cells to prevent bacterial growth by preventing pathogens from acquiring zinc (Clohessy & Golden, 1995). Not only can this prevent the growth of bacteria, but it can also disable zinc-dependent SOD, rendering the bacteria more susceptible to bactericidal ROS production by neutrophils (Kehl-Fie *et al.*, 2011). As yet, there is limited evidence for zinc-withholding as a means of pathogen defence in plants, although it is thought that metal-chelating chemicals such as polyphenols may restrict the availability of multiple metal ions, including zinc and copper (McDonald *et al.*, 1996; Mila *et al.*, 1998).

### Iron withholding in antagonism and biocontrol

In addition to competing with host plants for metal ions, plant pathogens compete directly with other plant-associated microorganisms for essential metals, a process that is of increasing interest as a means of enhancing biocontrol. In many well studied cases, siderophores produced by biocontrol bacteria are known to limit fungal growth, as they often have a higher affinity for iron than fungal siderophores and may even remove bound iron from these (Duffy *et al.*, 2003; Compant *et al.*, 2005). Similarly, the antimycoplasmal factor, micacocidin, initially identified in *Pseudomonas* sp. No. 57-250, and subsequently found to be produced by the plant pathogen *R. solanacearum*, is expressed under iron-limited conditions, binds metals, and may itself be a siderophore (Kobayashi *et al.*, 1998; Kreutzer *et al.*, 2011). Interest in the impact of metal on biocontrol activity is also driven by studies showing that both the fitness (Hartney *et al.*, 2011), and biocontrol activity (Duffy & Défago, 2000; Ownley *et al.*, 2003) of biocontrol bacteria can be impacted by iron and zinc availability.

The biocontrol strain *Pantoea agglomerans* C9-1 produces desferrioxamine siderophores (Smits *et al.*, 2010), which are known to sequester iron and thus inhibit the growth of bacteria unable to take them up (Dellagi *et al.*, 1998). Similarly, *Burkholderia* species such as the rice rhizosphere bacterium, *Burkholderia vietnamiensis* produce a



siderophore, ornibactin, which cannot be taken up by pseudomonads (Meyer *et al.*, 1995). Thus, biocontrol of bacterial disease using strains that compete for essential metals by producing different siderophores may be possible. In contrast, Wensing *et al.* (2010) found that siderophore production by the biocontrol strain *P. syringae* pv. *syringae* 22d/93, which produced the same siderophores as the target strain *P. syringae* pv. *glycinea* 1a/96, had no significant impact on biocontrol activity under the conditions tested. Although detailed consideration of the biocontrol field is beyond the scope of this review, it is clearly an area meriting further research. The various potential interactions between biocontrol bacteria, pathogens and host plants are summarised in Fig. 3.

### Metals as toxins in defence

In contrast to the metal-withholding mechanisms discussed above, there are instances where the plants'

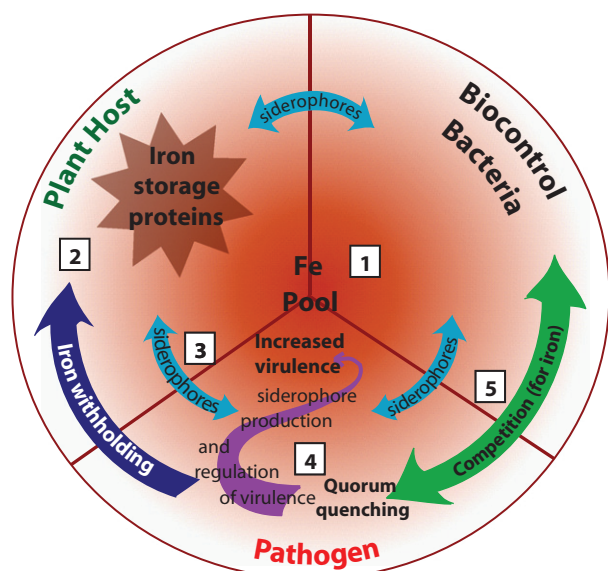

**Fig. 3.** The importance of iron in the interactions of pathogen, host and biocontrol agents. The finite amount of iron available in the environment may be thought of as an 'iron pool' for which different organisms compete (1). An important example of such competition is the withholding of iron from pathogens by hosts (2), using both iron storage proteins to sequester the metal and competitive uptake by high-affinity siderophores (3). Both iron itself and siderophores produced by the pathogen can have extensive effects upon the regulation of the pathogen's virulence, with virulence often, although not exclusively, increasing with higher iron availability (4). One mechanism through which iron can affect virulence is through its effects upon quorum-sensing systems, with low iron conditions leading to quenching of the quorum signal. Suppression of virulence and quorum sensing regulated gene expression through competition for iron may be one mechanism through which biocontrol bacteria can reduce pathogen virulence (5).

defence mechanism exposes the pathogen to an excess of a metal. An example is the bacterium *X. oryzae* pv. *oryzae*, which, when growing in the xylem of rice, can be limited by high concentrations of copper (Yuan *et al.*, 2010). The importance of this for the outcome of this plant–pathogen interaction is illustrated by the evolution of a bacterial TAL effector protein that initiates transcription of *Xa13*, a rice gene encoding a transmembrane transporter that works in concert with two additional rice proteins to remove copper from the xylem (Yuan *et al.*, 2011). Animals, too, are known to use copper as an antimicrobial (reviewed in Samanovic *et al.*, 2012). It has been suggested that a novel *Arabidopsis* MFS-family zinc transporter, an orthologue of which is induced by pathogen infection in maize (Simmons *et al.*, 2003), may release zinc from the vacuole in infected tissues, thus playing a role in defence (Haydon & Cobbett, 2007). Zinc is also known to have a role in defence in humans, with zinc-deficient humans being more susceptible to *Staphylococcus pneumonia* infection. It has been suggested that zinc acts to limit bacterial growth by competing for manganese transporters (McDevitt *et al.*, 2011). In this context, it is of interest that the NRAMP proteins discussed above may also function to transport manganese (Segond *et al.*, 2009).

### Indirect effects of metals in defence

As well as affecting pathogens directly through direct deficiency or toxicity, metals can affect plant–pathogen interactions indirectly *via* their inclusion in metalloenzymes. An exhaustive review of this topic is beyond the scope of this review, but a few examples of particular note are discussed here. Two metalloenzymes of particular importance in plant–pathogen interactions are SOD, which exists as three isoforms that can be separated according to their metallic cofactors of Fe, Mn and Cu/Zn (Kliebenstein *et al.*, 1998; Wu *et al.*, 2011), and catalase, which relies for its activity on four heme groups (Reid *et al.*, 1981; Willekens *et al.*, 1995). During the oxidative burst, plants produce such high concentrations of ROS that their own anti-oxidant defences are temporarily overwhelmed (Vanacker *et al.*, 1998). To prevent escalating damage to plant cells, it is essential that the plant possesses functional antioxidant enzymes to regain control of ROS levels at the appropriate time. Indeed, it is known that control of ROS levels is important in the plant's response to both biotic and abiotic stresses (Mittler, 2002; Prashanth *et al.*, 2008).

Some plant pathogens attempt to manipulate ROS production by the host as part of their pathogenicity (Fones & Preston, 2012). For example, the phytotoxin coronatine, employed by many strains of *P. syringae* and by the

soft rot pathogen *Pectobacterium atrosepticum*, causes light-dependent upregulation of ROS production and a concomitant suppression of SOD activity, and is essential for full virulence of these pathogens (Bender *et al.*, 1987; Ishiga *et al.*, 2008, 2009; Uppalapati *et al.*, 2008). Similarly, *P. aeruginosa* produces a redox active phenazine toxin called pyocyanin, which induces ROS production and systemic resistance in plants and animals, but enhances susceptibility to the fungal pathogen *Rhizoctonia solani* in rice (Mahajan-Miklos *et al.*, 1999; O'Malley *et al.*, 2003; De Vleeschauwer *et al.*, 2006).

Another enzyme which is important in plant defence is the pathogen-related protein, PR-10, of *Theobroma cacao*. This protein is a ribonuclease, which, when released during pathogen-induced programmed cell death, is internalised by fungal cells and can act as a fungicidal toxin against *Moniliophthora perniciosa*, the causal agent of witches' broom disease (Pungartnik *et al.*, 2009). Although the exact mechanism of toxicity is unclear, it has been demonstrated that toxicity is reduced if a fungal high-affinity copper transporter is not expressed, suggesting that either copper is needed for PR-10 enzyme activity, or that the toxin works by disrupting copper homeostasis in the pathogen (Pungartnik *et al.*, 2009). In a separate study, over-expression of maize ZmPR10.1 in *A. thaliana* was found to cause increased susceptibility to *P. syringae* pv. *tomato*, and Cu<sup>2+</sup> was identified as an inhibitor of ZmPR10 and ZmPR10.1 RNase activity (Xie *et al.*, 2010).

The final two aspects of the involvement of metals in plant defence we will cover in this section concern their role in the generation of ROS. ROS are understood to have a number of pivotal roles in plant defence, both as antimicrobials produced at the site of infection (Peng & Kuc, 1992; Lamb & Dixon, 1997; Wojtaszek, 1997) and as signals for further defence responses (Alvarez *et al.*, 1998; Love *et al.*, 2005; Torres *et al.*, 2006; Choi *et al.*, 2007; Van Breusegem *et al.*, 2008). The importance of metals for ROS production has already been noted. Redox active metals, particularly iron, can participate in Fenton reactions by which hydroxide radicals may be generated from H<sub>2</sub>O<sub>2</sub> (Pierre & Fontecave, 1999). Cereal crops traffic large vesicles containing H<sub>2</sub>O<sub>2</sub> and Fe<sup>3+</sup> to the site of *Blumeria graminis* infection, where they appear to participate in the oxidative burst; similarly, the ABC transporter *ATPEN3*, which is involved in the translocation of the redox active metal, cadmium, has been found to be involved in resistance to *P. syringae* and *Phytophthora infestans* (Hückelhoven, 2007). Iron appears to be involved in a feed-forward mechanism controlling ROS generation, for as well as participating in the generation of ROS, its efflux can also be signalled by H<sub>2</sub>O<sub>2</sub> (Lui *et al.*, 2007).

In addition to this direct role in the defensive production of anti-microbial ROS, metals can induce ROS in

plants by acting as stressors (Boominathan & Doran, 2003; Garnier *et al.*, 2006). Since ROS are important signals in the plant response to pathogen invasion, it is perhaps unsurprising that there is evidence of cross-talk between metal stress and pathogen resistance, (Mithöfer *et al.*, 2004). ROS, whether generated by biotic or abiotic stress, can induce the production of oxylipins, which also have signalling roles in plant defence (Blée, 2002; Mithöfer *et al.*, 2004). Although the mechanism has not been fully elucidated, low-intensity spraying of crops with nickel can induce phytoalexin production and protect against fungal infection (Wood & Reilly, 2007). It is logical to speculate that this effect may also be due to common signalling pathways between nickel and pathogen stress. There is, however, also evidence of a synergistic effect of metal and pathogen stress, in which each may increase the susceptibility of the plant to the other (Stroniski & Floriszak-Wieczorek, 1990; Miteva *et al.*, 2001).

### A special case – metal hyperaccumulating plants

Some plants found growing on metal-rich soils have an unusual interaction with metals, actively taking up and storing the metals in their aerial tissues. These are 'hyperaccumulators' (Jaffré *et al.*, 1976), defined as plants that take up 'exceptionally high concentrations of an element in the above ground parts of a plant under field conditions' (Pollard, 2000). For example, the brassica, *Noccaea* (formerly *Thlaspi*) *caerulescens*, can accumulate up to 30 000 µg g<sup>-1</sup> zinc and over 1300 µg g<sup>-1</sup> cadmium (Brown *et al.*, 1995). Around 400 plant taxa are classed as hyperaccumulators (Baker & Brookes, 1989; Freeman *et al.*, 2005). Nickel is the most commonly accumulated metal (Küpper *et al.*, 1999; Reeves & Baker, 2000; Assunção *et al.*, 2003), but zinc hyperaccumulation is also relatively common (Prasad & de Oliveira Freitas, 2003). Copper, too, can be hyperaccumulated, although the number of plants that do so is limited to around 25 species (Jiang *et al.*, 2004).

The reason for the evolution of metal hyperaccumulation is, at present, unknown, but the hypothesis that hyperaccumulated metals provide a defence against herbivores or pathogens (Boyd & Martens, 1992; Poschenrieder *et al.*, 2006), has received much attention. For herbivores, it is clear that deterrence does occur, although this depends on many factors (Boyd, 2007; Vesik & Reichman, 2009). There are a number of ways in which metals could protect plants; the so-called elemental defence hypothesis postulates that the metals act directly to deter or kill pests and pathogens, but it is possible that protection could occur in other ways. Poschenrieder *et al.* (2006) use the term 'metal

fortification' to describe the possibility that hyperaccumulated metals induce responses in the plant that might normally occur in response to a pathogen attack, thus indirectly rendering the plant less susceptible to disease. This is plausible, since plant responses to biotic and abiotic stress share a number of common features and signalling pathways (Piffanelli *et al.*, 2002; Mithöfer *et al.*, 2004; Freeman *et al.*, 2005; Chmielowska *et al.*, 2010).

As this review has shown, the ways in which metals can influence or potentially influence plant–pathogen interactions are extremely diverse, and can be complex or indirect. However, the idea of simple protection of hyperaccumulators against bacteria by direct metal toxicity has received support from work which demonstrated that zinc levels in the *N. caerulea* were sufficient to account for observed inhibition of the bacterial pathogen, *P. syringae* pv. *maculicola*, in planta, and that bacterial survival in these plants was correlated to zinc tolerance (Fones *et al.*, 2010; Figs 1 and 4). These observations provide one of the clearest cases for the importance of metals in hyperaccumulator–pathogen interactions to date.

## Concluding remarks

In this review, the ways in which metals can influence plant–pathogen interactions have been explored. Metals, especially those with redox activity, are essential for life *via* their indispensable roles in various enzymes. Because such metals have the capacity to elicit the production of ROS, they can be toxic in excess and their uptake and homeostasis must be closely controlled. Some of these metals are also subject to limited availability in biotic environments. These factors combined ensure that the manipulation of their availability is a key strategy for

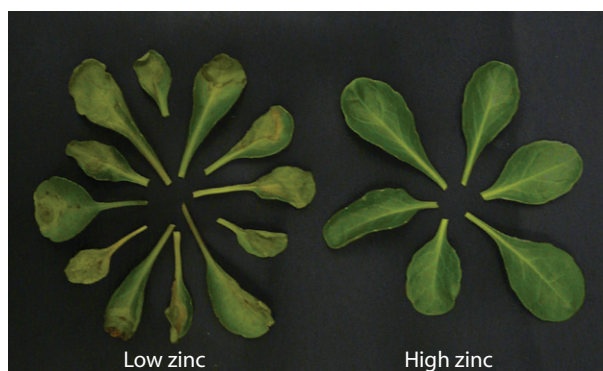

**Fig. 4.** The effect of zinc hyperaccumulation on susceptibility of *Noccaea caerulea* to infection by *Pseudomonas syringae*. Plants shown were grown hydroponically for 10 weeks with either 0.04 (low) or 300 (high)  $\mu\text{M}$  Zn in the nutrient solution, and inoculated with bacteria at  $10^8$  CFU  $\text{mL}^{-1}$ . Photographed leaves show the development of symptoms 7 days after inoculation.

both microbial pathogens and their plant hosts. This occurs *via* competition for essential metals and also *via* host attempts to overwhelm the pathogen with a toxic excess of metal, a technique that may have been adopted as a constitutive form of defence in metal hyperaccumulating plants. It is also common for metals to be applied directly for crop protection against disease.

As well as applying metals as anti-microbials, there are incentives to either supplement soils with mineral nutrients or to breed or engineer plants with increased ability to assimilate and accumulate the nutrients already available to them, an approach known as biofortification of crops. This is an increasingly important ideal in 21st century agriculture: for example, zinc deficiency is an important problem throughout the world, affecting around 33% of people, rising to 74% in some countries (Sillanpää, 1982; Hotz & Brown, 2004; Singh, 2008) and causing, in severe cases, important physical and psychological difficulties in humans and livestock (Hotz & Brown, 2004; Graham, 2008). Iron is also an element that many cultivated soils lack in a bioavailable form, with the World Health Organisation (WHO) estimating that 30% of the world's human population are anaemic. To date, successful attempts have been made to increase the iron and zinc content of rice, pineapple and banana by expression of soybean ferritin (Goto *et al.*, 1999; Kumar *et al.*, 2011; Mhatre *et al.*, 2011). Approaches such as biofortification may also allow the cultivation of additional land; as one common problem that affects land use and crop yield is a lack, or toxic excess, of mineral nutrients (Lal, 2009; Beddington, 2010). With an expanding world population, it is of increasing importance that we find ways of exploiting agricultural land to the fullest effect, while limiting malnutrition (Beddington, 2010), however the impact of biofortification strategies on plant disease resistance remains to be explored.

As we have seen, metals and the systems that regulate their uptake and homeostasis are often implicated in the regulation of virulence and pathogenicity genes, including the T3SS; they are also essential components of the enzymes used in the production and tolerance of ROS, another key feature of the battle between plants and pathogens. Thus, to maximise future productivity, while minimising losses from crop disease, researchers must endeavour to understand all the ways in which metals can influence the interactions between plants and pathogens.

## References

- Adaskaveg JE & Hine RB (1985) Copper tolerance and zinc sensitivity of Mexican strains of *Xanthomonas campestris* pv. *vesicatoria*, causal agent of bacterial spot of pepper. *Plant Dis* **69**: 993–996.



- Alfano J & Collmer A (1997) The Type III (Hrp) secretion pathway of plant pathogenic bacteria: trafficking harpins, Avr proteins, and death. *J Bacteriol* **179**: 5655–5662.
- Alvarez M, Pennell R, Meijer P, Ishikawa A, Dixon R & Lamb C (1998) Reactive oxygen intermediates mediate a systemic signal network in the establishment of plant immunity. *Cell* **92**: 773–784.
- Andersen GL, Menkissoglou O & Lindow SE (1991) Occurrence and properties of copper tolerant strains of *Pseudomonas syringae* isolated from fruit trees in California. *Phytopathology* **81**: 648–656.
- Assunção A, Schol H & Aarts M (2003) *Thlaspi caerulescens*, an attractive model species to study heavy metal hyperaccumulation in plants. *New Phytol* **159**: 351–360.
- Bagg A & Neilands JB (1987) Ferric uptake regulation protein acts as a repressor, employing iron (II) as a cofactor to bind the operator of an iron transport operon in *Escherichia coli*. *Biochemistry* **26**: 5471–5477.
- Baker A & Brookes R (1989) Terrestrial higher plants which hyperaccumulate metallic elements a review of their distribution, ecology and phytochemistry. *Biorecovery* **1**: 81–126.
- Banin E, Vasil ML & Greenberg P (2005) Iron and *Pseudomonas aeruginosa* biofilm formation. *P Natl Acad Sci USA* **102**: 11076–11081.
- Barhoom S, Kupiec M, Zhao X, Xu J-R & Sharon A (2008) Functional characterisation of CgCTR2, a putative vacuolar copper transporter that is involved in germination and pathogenicity in *Colletotrichum gloeosporioides*. *Eukaryot Cell* **7**: 10998–11008.
- Barta TM, Kinscherf TG & Willis DK (1992) Regulation of tabtoxin production by *lemA* gene in *Pseudomonas syringae*. *J Bacteriol* **174**: 3021–3029.
- Bearden SW, Fetherston JD & Perry RD (1997) Genetic organization of the yersiniabactin biosynthetic region and construction of avirulent mutants in *Yersinia pestis*. *Infect Immun* **65**: 1659–1668.
- Beare PA, For RJ, Martin LW & Lamont IL (2003) Siderophore-mediated cell signalling in *Pseudomonas aeruginosa*: divergent pathways regulate virulence factor production and siderophore receptor synthesis. *Mol Microbiol* **47**: 195–207.
- Beddington J (2010) Food security: contributions from science to a new and greener revolution. *Philos Trans R Soc Lond B Biol Sci* **365**: 51–61.
- Behlau F, Canteros BI, Minsavage GV, Jones JB & Graham JH (2011) Molecular characterization of copper resistance genes from *Xanthomonas citri* subsp. *citri* and *Xanthomonas alfalfae* subsp. *citrumelonis*. *Appl Environ Microbiol* **77**: 4089–4096.
- Bender CL, Stone HE, Sims JJ & Cooksey DA (1987) Reduced pathogen fitness of *Pseudomonas syringae* pv. *tomato* Tn5 mutants defective in coronatine production. *Physiol Mol Plant Pathol* **30**: 272–283.
- Bender CL, Alarcón-Chaidez F & Gross DC (1999) *Pseudomonas syringae* phytotoxins: mode of action, regulation, and biosynthesis by peptide and polyketide synthetases. *Microbiol Mol Biol Rev* **63**: 266–292.
- Berti AD & Thomas MG (2009) Analysis of achromobactin biosynthesis by *Pseudomonas syringae* pv. *syringae* B728a. *J Bacteriol* **191**: 4594–4604.
- Bezborovainy A (1981) Antimicrobial properties of iron-binding proteins. *Adv Exp Med Biol* **135**: 139–154.
- Bhatt G & Denny TP (2004) *Ralstonia solanacearum* iron scavenging by the siderophore Staphyloferrin B Is controlled by PhcA, the global virulence regulator. *J Bacteriol* **186**: 7896–7904.
- Bleé E (2002) Impact of phyto-oxylipins in plant defense. *Trends Plant Sci* **7**: 315–322.
- Blindauer CA, Harrison MD, Parkinson JA, Robinson AK, Cavet JS, Robinson NJ & Sadler PJ (2001) A metallothionein containing a zinc finger within a four-metal cluster protects a bacterium from zinc toxicity. *P Natl Acad Sci USA* **98**: 9593–9598.
- Bollinger N, Hassett D, Iglewski BH, Costerton JW & McDermot JR (2001) Gene expression in *Pseudomonas aeruginosa*: evidence of iron-override effects on quorum sensing and biofilm specific gene regulation. *J Bacteriol* **183**: 1990–1996.
- Boominathan R & Doran P (2003) Cadmium tolerance and antioxidative defences in hairy roots of the cadmium hyperaccumulator, *Thlaspi caerulescens*. *Biotechnol Bioeng* **83**: 158–167.
- Boughammoura A, Franza T, Dellagi A, Roux C, Matzanke-Markstein B & Expert D (2007) Ferritins, bacterial virulence and plant defence. *Biomaterials* **20**: 347–353.
- Boughammoura A, Matzanke BF, Böttger L, Reverchon S, Lesuisse E, Expert D & Franza T (2008) Differential role of ferritins in iron metabolism and virulence of the plant-pathogenic bacterium *Erwinia chrysanthemi* 3937. *J Bacteriol* **190**: 1518–1530.
- Boyd R (2007) The defense hypothesis of elemental hyperaccumulation: status, challenges and new directions. *Plant Soil* **293**: 153–176.
- Boyd R & Martens S (1992) *The Vegetation of Ultramafic (Serpentine) Soils*. Intercept Limited, Andover, UK, pp. 279–289.
- Braud A, Hoegy F, Jezequel K, Lebeau T & Schalk IJ (2009) New insights into the metal specificity of the *Pseudomonas aeruginosa* pyoverdine-iron uptake pathway. *Environ Microbiol* **11**: 1079–1091.
- Bronstein PA, Marrichi M, Cartinhour S, Schneider DJ & DeLisa MP (2005) Identification of a twin-arginine translocation system in *Pseudomonas syringae* pv. *tomato* DC3000 and its contribution to pathogenicity and fitness. *J Bacteriol* **187**: 8450–8461.
- Bronstein P, Filiatrault M, Myers C, Rutzke M, Schneider D & Cartinhour S (2008) Global transcriptional responses of *Pseudomonas syringae* DC3000 to changes in iron bioavailability *in vitro*. *BMC Microbiol* **8**: 209.
- Brown S, Chaney R, Angle J & Baker A (1995) Zinc and cadmium uptake by hyperaccumulator *Thlaspi caerulescens*



- grown in nutrient solution. *Soil Sci Soc Am J* **59**: 125–133.
- Brune A, Urbach W & Dietz K (1994) Differential toxicity of heavy metals is partly related to a loss of preferential extraplasmic compartmentalisation: a comparison and Cd, Mo, Ni and Zn stress. *New Phytol* **129**: 403–409.
- Buell RC, Joardar V, Lindeberg M *et al.* (2003) The complete genome of the *Arabidopsis* and tomato pathogen *Pseudomonas syringae* pv. *tomato* DC3000. *P Natl Acad Sci USA* **100**: 10181–10186.
- Bull CT, Ishimaru CA & Loper JE (1994) Two genomic regions involved in catechol siderophore production by *Erwinia carotovora*. *Appl Environ Microbiol* **60**: 662–669.
- Bullen JJ (1981) The significance of iron in infection. *Rev Infect Dis* **3**: 1127–1138.
- Busenlehner L, Pennella M & Giedroc D (2003) The SmtB/ArsR family of metalloregulatory transcriptional repressors: structural insights into prokaryotic metal resistance. *FEMS Microbiol Rev* **27**: 131–143.
- Butcher BG, Bronstein PA, Myers CR *et al.* (2011) Characterization of the Fur regulon in *Pseudomonas syringae* pv. *tomato* DC3000. *J Bacteriol* **193**: 4598–4611.
- Cakmak I, Güllit KY, Marschner H & Graham RD (1994) Effect of zinc and iron deficiency on phytosiderophore release in wheat genotypes differing in zinc efficiency. *J Plant Nutr* **17**: 1–17.
- Cánovas D, Cases I & de Lorenzo V (2003) Heavy metal resistance and metal homeostasis in *Pseudomonas putida* as revealed by complete genome analysis. *Environ Microbiol* **5**: 1242–1256.
- Castiglione S, Franchin C, Fossati T, Lingua G, Torrigiani P & Biondi S (2007) High zinc concentrations rescue rooting capacity and alter metallothionein gene expression in white poplar (*Populus alba* L. cv. Villafranca). *Chemosphere* **67**: 1117–1126.
- Cazorla FM, Arrebola E, Sesma A, Pérez-García A, Codina JC, Murillo J & de Vicente A (2002) Copper resistance in *Pseudomonas syringae* strains isolated from mango is encoded mainly by plasmids. *Phytopathology* **92**: 909–916.
- Cha JY, Lee JS, Oh J-L, Choi JW & Baik HS (2008) Functional analysis of the role of Fur in the virulence of *Pseudomonas syringae* pv. *tabaci* 11528: Fur controls expression of genes involved in quorum sensing. *Biochem Biophys Res Comm* **366**: 281–287.
- Chakraborty R & Newton AC (2011) Climate change, plant diseases and food security: an overview. *Plant Pathol* **60**: 12–14.
- Chakraborty R, Storey E & van der Helm D (2007) Molecular mechanism of ferrisiderophore passage through the outer membrane receptor proteins of *Escherichia coli*. *Biomaterials* **20**: 263–274.
- Chmielowska J, Veloso J, Gutiérrez J, Silvar C & Díaz J (2010) Cross-protection of pepper plants stressed by copper against a vascular pathogen is accompanied by the induction of a defence response. *Plant Sci* **178**: 176–182.
- Choi H, Kim Y, Lee SC, Hong J & Hwang B (2007) Hydrogen peroxide generation by the pepper extracellular peroxidase CaPO2 activates local and systemic cell death and defence response to bacterial pathogens. *Plant Physiol* **145**: 890–904.
- Clausen C & Green F (2003) Oxalic acid overproduction by copper tolerant brown-rot basidiomycetes on southern yellow pine treated with copper-based preservatives. *Int Biodeterior Biodegradation* **51**: 139–144.
- Clemens S & Peršoh D (2009) Multitasking phytochelatin synthases. *Plant Sci* **177**: 266–271.
- Clohesy PA & Golden BE (1995) Calprotectin-mediated zinc chelation as a biostatic mechanism in host defence. *Scand J Immunol* **42**: 551–556.
- Cody YS & Gross DC (1987) Outer membrane protein mediating iron uptake via pyoverdins, the fluorescent siderophore produced by *Pseudomonas syringae* pv. *syringae*. *J Bacteriol* **169**: 2207–2214.
- Collmer A, Badel J, Charkowski A *et al.* (2000) *Pseudomonas syringae* Hrp type III secretion system and effector proteins. *P Natl Acad Sci USA* **97**: 8770–8777.
- Compant S, Duffy B, Nowark J, Clément C & Barka EA (2005) Use of plant growth promoting bacteria for biocontrol of plant diseases: principles, mechanisms of action and future prospects. *Appl Environ Microbiol* **71**: 4951–4959.
- Cooksey DA (1994) Molecular mechanisms of copper resistance and accumulation in bacteria. *FEMS Microbiol Rev* **14**: 381–386.
- Cooksey DA, Azad HR, Cha J-S & Lim CK (1990) Copper resistance gene homologs in pathogenic and saprophytic bacterial species from tomato. *Appl Environ Microbiol* **56**: 431–435.
- Cornelis P & Matthijs S (2002) Diversity of siderophore-mediated iron uptake systems in fluorescent pseudomonads: not only pyoverdins. *Environ Microbiol* **4**: 787–798.
- Cosio C, Martinoia E & Keller C (2004) Hyperaccumulation of cadmium and zinc in *Thlaspi caerulescens* and *Arabidopsis halleri* at the leaf cellular level. *Plant Physiol* **143**: 716–725.
- Curie C, Alonso JM, Le Jean M, Ecker JR & Briat JF (2000) Involvement of NRAMP1 from *Arabidopsis thaliana* in iron transport. *Biochem J* **347**: 749–755.
- Dauch AL & Jabaji-Hare SH (2006) Metallothionein and bZIP transcription factor genes from Velvetleaf and their differential expression following *Colletotrichum coccoides* infection. *Phytopathology* **96**: 1116–1123.
- De Vleeschauwer D, Cornelis P & Höfte M (2006) Redox-active pyocyanin secreted by *Pseudomonas aeruginosa* TNSK2 triggers systemic resistance to *Magnaporthe grisea* but enhances *Rhizoctonia solani* susceptibility in rice. *Mol Plant Microbe Interact* **19**: 1406–1419.
- del Campo R, Russi P, Mara P, Mara H, Peyrou M, de León IP & Gaggero C (2009) *Xanthomonas axonopodis* pv. *citri* enters the VBNC state after copper treatment and retains its virulence. *FEMS Microbiol Lett* **298**: 143–148.
- Dellagi A, Brisset M-N, Paulin J-P & Expert D (1998) Dual role of desferrioxamine in *Erwinia amylovora* pathogenicity. *Mol Plant Microbe Interact* **11**: 734–742.

- Dellagi A, Rigault M, Segond D, Roux C, Kraepiel Y, Cellier F, Briat J-F, Gaymard F & Expert D (2005) Siderophore-mediated upregulation of *Arabidopsis* ferritin expression in response to *Erwinia chrysanthemi* infection. *Plant J* **43**: 262–272.
- Dellagi A, Segond D, Rigault M, Fagard M, Simon C, Saindrenan P & Expert D (2009) Microbial siderophores exert a subtle role in *Arabidopsis* during infection by manipulating the immune response and the iron status. *Plant Physiol* **150**: 1687–1696.
- Denny T (2007) Plant pathogenic *Ralstonia* species. *Plant-Associated Bacteria* (Gnanamanickam SS, ed). Springer, Dordrecht.
- Dietrich LEP, Price-Whelan A, Petersen A, Whiteley M & Newman DK (2006) The phenazine pyocyanin is a terminal signalling factor in the quorum sensing network of *Pseudomonas aeruginosa*. *Mol Microbiol* **61**: 1308–1321.
- Diggle S, Matthijs S, Wright VJ *et al.* (2007) The *Pseudomonas aeruginosa* 4-quinolone signal molecules HHQ and PQS play multifunctional roles in quorum sensing and iron entrapment. *Chem Biol* **14**: 87–96.
- Dong Y-H, Wang L-H, Xu J-L, Zhang H-B, Zhang X-F & Zhang L-H (2001) Quenching quorum-sensing-dependent bacterial infection by an *N*-acyl homoserine lactonase. *Nature* **411**: 813–817.
- Duffy BK & Défago G (2000) Controlling Instability in *gacS-gacA* regulatory genes during inoculant production of *Pseudomonas fluorescens* biocontrol strains. *Appl Environ Microbiol* **66**: 3142–3150.
- Duffy B, Schouten A & Raaijmakers JM (2003) Pathogen self-defense: mechanism to counteract microbial antagonism. *Annu Rev Phytopathol* **41**: 501–538.
- Dulla GFJ, Krasileva KV & Lindow SE (2010) Interference of quorum sensing in *Pseudomonas syringae* by bacterial epiphytes that limit iron availability. *Environ Microbiol* **12**: 1762–1774.
- Durbin RD & Uchytel TF (1985) The role of zinc in regulating tabtoxin production. *Experientia* **41**: 136–137.
- Ellermeier JR & Slauch JM (2008) Fur regulates expression of the *Salmonella* pathogenicity island 1 type III secretion system through HilD. *J Bacteriol* **190**: 476–486.
- Enard C, Dioloz A & Expert D (1988) Systemic virulence of *Erwinia chrysanthemi* 3937 requires a functional iron assimilation system. *J Bacteriol* **170**: 2419–2426.
- Expert D (1999) Withholding and exchanging iron: interactions between *Erwinia* spp. and their plant hosts. *Annu Rev Phytopathol* **37**: 307–334.
- Expert D, Neema C, Laulhère J, Sauvage C, Masclaux C & Mahé B (1994) Iron and plant pathogenesis: the systemic soft rot disease induced by *Erwinia chrysanthemi* 3937 on saintpaulia plants. *Molecular Mechanisms of Bacterial Virulence* (Kado C & Crosa J, eds), pp. 161–171. Kluwer Academic Publishers, Dordrecht, The Netherlands.
- Expert D, Enard C & Masclaux C (1996) The role of iron in plant host-pathogen interactions. *Trends Microbiol* **4**: 232–236.
- Faulkner MJ & Helmann JD (2011) Peroxide stress elicits adaptive changes in bacterial metal ion homeostasis. *Antioxid Redox Signal* **15**: 175–189.
- Floyd R (1991) Bordeaux mixture and similar copper fungicides. *Farmnote* 78/1991.
- Fones HN, Davis CAR, Fang F, Rico A, Smith JAC & Preston GM (2010) Metal hyperaccumulation armors plants against disease. *PLoS Pathog* **6**: e1001093.
- Fones HN & Preston GM (2012) Reactive oxygen and oxidative stress tolerance in plant pathogenic *Pseudomonas*. *FEMS Microbiol Lett* **327**: 1–8.
- Forbes JR & Gros P (2001) Divalent-metal transport by NRAMP proteins at the interface of host-pathogen interactions. *Trends Microbiol* **9**: 397–403.
- Fordham-Skelton A, Robinson N & Goldsbrough P (1998) *Metal Ions in Gene Regulation*. Chapman and Hall, London, UK, pp. 398–431.
- Francki KT, Chang BJ, Mee BJ, Collignon PJ, Susai V & Keese PK (2000) Identification of genes associated with copper tolerance in an adhesion-defective mutant of *Aeromonas veronii* biovar *sobria*. *FEMS Immunol Med Microbiol* **29**: 115–121.
- Franza T, Michaud-Soret I, Piqueret P & Expert D (2002) Coupling of iron assimilation and pectinolysis in *Erwinia chrysanthemi* 3937. *Mol Plant Microbe Interact* **15**: 1181–1191.
- Franza T, Mahé B & Expert D (2005) *Erwinia chrysanthemi* requires a second iron transport route dependent of the siderophore achromobactin for extracellular growth and plant infection. *Mol Microbiol* **55**: 261–275.
- Freeman J, Garcia D, Kim D, Hopf A & Salt D (2005) Constitutively elevated salicylic acid signals glutathione-mediated nickel tolerance in *Thlaspi* nickel hyperaccumulators. *Plant Physiol* **137**: 1082–1091.
- Fry WE & Smart CD (1999) The return of *Phytophthora infestans*, a potato pathogen that just won't quit. *Potato Res* **42**: 279–282.
- Garnier L, Simon-Plas F, Thuleau P, Agnel J-P, Blein J, Ranjeva R & Montillet J-L (2006) Cadmium affects tobacco cells by a series of three waves of reactive oxygen species that contribute to cytotoxicity. *Plant, Cell Environ* **29**: 1958–1969.
- Geider K (1999) Interference of copper sulphate in growth of *Erwinia amylovora*. *J Phytopathol* **147**: 521–526.
- Gold B, Deng H, Bryk R, Vargas D, Eliezer D, Roberts J, Jiang X & Nathan C (2008) Identification of a copper-binding metallothionein in pathogenic mycobacteria. *Nat Chem Biol* **4**: 609–616.
- Goswami T, Bhattacharjee A, Babal P, Searle S, Moore E, Li L & Blackwell JM (2001) Natural-resistance-associated macrophage protein 1 is an H<sup>+</sup>/bivalent cation antiporter. *Biochem J* **354**: 511–519.
- Goto F, Yoshihara T, Shigemoto N, Toki S & Takaiwa F (1999) Iron fortification of rice seed by the soybean ferritin gene. *Nat Biotechnol* **17**: 282–286.
- Graham RD (2008) Micronutrient deficiencies in crops and their global significance. *Micronutrient Deficiencies in Global*

- Crop Production* (Alloway BJ, ed), pp. 41–61. Springer, Dordrecht.
- Graham RD (1983) Effect of nutrient stress on susceptibility of plants to disease, with particular reference to the trace elements. *Adv Bot Res* **10**: 221–276.
- Grant S, Fisher E, Chang J, Mole B & Dangl J (2006) Subterfuge and manipulation: type III effector proteins of phytopathogenic bacteria. *Annu Rev Microbiol* **60**: 425–449.
- Grass G, Rensing C & Solioz M (2011) Metallic copper as an antimicrobial surface. *Appl Environ Microbiol* **77**: 1541–1547.
- Greenwald JW, Greenwald CJ, Philmus BJ, Begley TP & Gross DC (2012) RNA-seq analysis reveals that an ECF  $\sigma$  factor, AcsS, regulates Achromobactin biosynthesis in *Pseudomonas syringae* pv. *syringae* B728a. *PLoS ONE* **7**: e34804.
- Grenier A-M, Duport G, Pagès S, Condemine G & Rahbé Y (2006) The phytopathogen *Dickeya dadantii* (*Erwinia chrysanthemi* 3937) is a pathogen of the pea aphid. *Appl Environ Microbiol* **72**: 1956–1965.
- Grinter R, Milner J & Walker D (2012) Ferredoxin containing bacteriocins suggest a novel mechanism of iron uptake in *Pectobacterium* spp. *PLoS ONE* **7**: e33033.
- Gunshin H, Mackenzie B, Berger UV, Gunshin Y, Romero MF, Boron WF, Nussberger S, Gollan JL & Hediger MA (1997) Cloning and characterization of a mammalian proton-coupled metal-ion transporter. *Nature* **388**: 482–488.
- Hammer ND & Skaar EP (2012) The impact of metal sequestration on *Staphylococcus aureus* metabolism. *Curr Opin Microbiol* **1**: 10–14.
- Hancock JG & Huisman OC (1981) Nutrient movement in host-pathogen systems. *Annu Rev Phytopathol* **19**: 309–331.
- Hanikenne M (2003) *Chlamydomonas reinhardtii* as a eukaryotic photosynthetic model for studies of heavy metal homeostasis and tolerance. *New Phytol* **159**: 331–340.
- Hänsch R & Mendel R (2009) Physiological functions of mineral micronutrients (Cu, Zn, Mn, Fe, Ni, Mo, B, Cl). *Curr Opin Plant Biol* **12**: 259–266.
- Hantke K (2001) Bacterial zinc transporters and regulators. *Biometals* **14**: 239–249.
- Hantke K (2005) Bacterial zinc uptake and regulators. *Curr Opin Microbiol* **8**: 196–202.
- Hartney SL, Mazurier S, Kidarsa TA, Quecine ME, Lemenceau P & Loper JE (2011) Ton-B dependent outer-membrane proteins and siderophore utilization in *Pseudomonas fluorescens* Pf-5. *Biometals* **24**: 193–213.
- Hassett DJ, Sokol PA, Howell ML, Ma JF, Schweizer HT, Ochsner V & Vasil ML (1996) Ferric uptake regulator (Fur) mutants of *Pseudomonas aeruginosa* demonstrate defective siderophore mediated iron uptake, aerobic growth and decreased superoxide dismutase and catalase activities. *J Bacteriol* **178**: 3996–4003.
- Haydon MJ & Cobbett CS (2007) A novel major facilitator superfamily protein at the tonoplast influences zinc tolerance and accumulation in *Arabidopsis*. *Plant Physiol* **143**: 1705–1719.
- Hibbing ME & Fuqua C (2011) Antiparallel and interlinked control of cellular iron levels by the Irr and RirA regulators of *Agrobacterium tumefaciens*. *J Bacteriol* **193**: 3461–3472.
- Hirst PH, Riley AM, Mills SJ, Spiers ID, Poyner DR, Freeman S, Poter BV & Smith AW (1999) Inositol polyphosphate-mediated iron transport in *Pseudomonas aeruginosa*. *J Appl Microbiol* **86**: 537–543.
- Hopkins DL (1989) *Xylella fastidiosa*, a xylem limited bacterial pathogen of plants. *Annu Rev Plant Pathol* **27**: 271–290.
- Hotz C & Brown K (2004) Assessment of the risk of zinc deficiency in populations and options for its control. *Food Nutr Bull* **25**: 94–204.
- Houlton S (2009) Double standard in pesticide ban? [www.rsc.org/chemistryworld/News/2009/April/07040901.asp](http://www.rsc.org/chemistryworld/News/2009/April/07040901.asp).
- Hu Y, Wang H, Zhang M & Sun L (2009) Molecular analysis of the copper-responsive CopRSCD of a pathogenic *Pseudomonas fluorescens* strain. *J Microbiol* **47**: 277–286.
- Huang H-E, Ger M-J, Chen C-Y, Yip M-K, Chung M-C & Feng T-T (2006) Plant ferredoxin-like protein (PFLP) exhibits an anti-microbial ability against soft-rot pathogen *Erwinia carotovora* subsp. *carotovora* *in vitro* and *in vivo*. *Plant Sci* **171**: 17–23.
- Huang DL, Tang DJ, Liao Q *et al.* (2008) The Zur of *Xanthomonas campestris* functions as a repressor and an activator of putative zinc homeostasis genes via recognizing two distinct sequences within its target promoters. *Nucleic Acids Res* **36**: 4295–4309.
- Huang D-L, Tang D-J, Liao Q, Li X-Q, He Y-Q, Feng J-X, Jiang B-L, Tao G & Tang J-L (2009) The Zur of *Xanthomonas campestris* is involved in hypersensitive response and positively regulates the expression of the *hrp* cluster via HrpX but not HrpG. *Mol Plant Microbe Interact* **22**: 321–329.
- Hückelhoven R (2007) Transport and sequestration in plant-microbe interactions. *Curr Opin Plant Biol* **10**: 573–579.
- Hugouvieux-Cotte-Pattat N, Condemine G, Nasser W & Reverchon S (1996) Regulation of pectinolysis in *Erwinia chrysanthemi*. *Annu Rev Microbiol* **50**: 213–257.
- Hurley MN, Cámara M & Smyth AR (2012) Novel approaches to the treatment of *Pseudomonas aeruginosa* infections in cystic fibrosis. *Eur Respir J* **40**: 1014–1023.
- Ishiga Y, Uppalapati SR, Ishiga T, Elavarthi S, Martin B & Bender CL (2008) The phytotoxin coronatine induces light-dependent reactive oxygen species in tomato seedlings. *New Phytol* **181**: 147–160.
- Ishiga Y, Uppalapati SR, Ishiga T, Elavarthi S, Martin B & Bender CL (2009) Involvement of coronatine-inducible reactive oxygen species in bacterial speck disease of tomato. *Plant Signal Behav* **4**: 237–239.
- Ishimaru CA & Loper JE (1992) High-affinity iron uptake systems present in *Erwinia carotovora* subsp. *carotovora* include the hydroxamate siderophore aerobactin. *J Bacteriol* **174**: 2993–3003.
- Jack E, Hakvoort H, Reumer A, Verkley J, Schat H & Ernst W (2007) Real-time PCR analysis of metallothionein-2b

- expression in metalliculous and non-metalliculous populations of *Silene vulgaris* (Moench) Garke. *Environ Exp Bot* **59**: 84–91.
- Jaffré T, Brooks R, Lee J & Reeves R (1976) *Sebertia acuminata*: a hyperaccumulator of nickel from New Caledonia. *Science* **193**: 579–580.
- Jiang LY, Yang XE & He ZL (2004) Growth response and phytoextraction of copper at different levels in soils by *Elsholtzia splendens*. *Chemosphere* **55**: 1179–1187.
- Jittawuttipoka T, Sallabhan R, Vattanaviboon P, Fuangthong M & Mongkolsuk S (2010) Mutations of ferric uptake regulator (*fur*) impair iron homeostasis, growth, oxidative stress survival, and virulence of *Xanthomonas campestris* pv. *campestris*. *Arch Microbiol* **192**: 331–339.
- Johnson L (2008) Iron and siderophores in fungal-host interactions. *Mycol Res* **112**: 170–183.
- Johnston A, Todd J, Curson A, Lei S, Nikolaidou-Katsaridou N, Gelfand M & Rodionov D (2007) Living without Fur: the subtlety and complexity of iron-responsive gene regulation in the symbiotic bacterium *Rhizobium* and other  $\alpha$ -proteobacteria. *Biometals* **20**: 501–511.
- Jones AM & Wildermuth MC (2011) The phytopathogen *Pseudomonas syringae* pv. *tomato* DC3000 has three high-affinity iron-scavenging systems functional under iron limitation conditions but dispensable for pathogenesis. *J Bacteriol* **193**: 2767–2775.
- Jones AM, Lindow SE & Wildermuth MC (2007) Salicylic Acid, Yersiniabactin, and Pyoverdinin production by the model phytopathogen *Pseudomonas syringae* pv. *tomato* DC3000: synthesis, regulation, and impact on tomato and *Arabidopsis* host plants. *J Bacteriol* **189**: 6773–6786.
- Karamanoli K, Bouligaraki P, Constantinidou H-IA & Lindow SE (2011) Polyphenolic compounds on leaves limit iron availability and affect growth of epiphytic bacteria. *Ann Appl Biol* **159**: 99–108.
- Kehl-Fie TE, Chitayat S, Hood MI, Damo S, Restrepo N, Garcia C, Munro KA, Chazin WJ & Skaar EP (2011) Nutrient metal sequestration by Calprotectin inhibits bacterial superoxide defense, enhancing neutrophil killing of *Staphylococcus aureus*. *Cell Host Microbe* **10**: 158–164.
- Kim BJ, Park JH, Park TH, Bronstein PA, Schneider DJ, Cartinhour SW & Shuler ML (2009) Effect of iron concentration on the growth rate of *Pseudomonas syringae* and the expression of virulence factors in *hrp*-inducing minimal medium. *Appl Environ Microbiol* **75**: 2720–2726.
- Kim BJ, Schneider DJ, Cartinhour SW & Shuler ML (2010) Complex responses to culture conditions in *Pseudomonas syringae* pv. *tomato* DC3000 continuous cultures: the role of iron in cell growth and virulence factor induction. *Biotechnol Bioeng* **105**: 955–964.
- Kirchberg J, Büttner D, Thieme B & Sawers RG (2012) Aconitase B Is required for optimal growth of *Xanthomonas campestris* pv. *vesicatoria* in pepper plants. *PLoS ONE* **7**: e34941.
- Kitphati W, Ngok-Ngam P, Suwanmaneerat S, Sukchawalit R & Mongkolsuk S (2007) *Agrobacterium tumefaciens fur* has important physiological roles in boron and manganese homeostasis, the oxidative stress response, and full virulence. *Appl Environ Microbiol* **73**: 4760–4768.
- Kliebenstein DJ, Monde R-A & Last RL (1998) Superoxide dismutase in *Arabidopsis*: an eclectic enzyme family with disparate regulation and protein localization. *Plant Physiol* **118**: 637–650.
- Kobayashi S, Hidaka S, Kawamura Y, Ozaki M & Hayase Y (1998) Micacocidin A, B and C, novel antimycoplasmal agents from *Pseudomonas* sp. I. taxonomy, fermentation, isolation, physico-chemical properties and biological activities. *J Antibiot* **51**: 323–327.
- Krämer U, Pickering I, Prince R, Raskin I & Salt D (2000) Subcellular localisation and speciation of nickel in hyperaccumulator and non-accumulator *Thlaspi* species. *Plant Physiol* **122**: 1343–1353.
- Kreutzer MF, Kage H, Gebhardt P, Wackler B, Saluz HP, Hoffmeister D & Nett M (2011) Biosynthesis of a complex yersiniabactin-like natural product via the *mic* locus in phytopathogen *Ralstonia solanacearum*. *Appl Environ Microbiol* **77**: 6117–6124.
- Kuflik T, Prodorutti D, Frizzi A, Gafni Y, Simon S & Pertot I (2009) Optimisation of copper treatments in organic viticulture by using a web-based support system. *Comput Electron in Agr* **68**: 36–43.
- Kumar GB, Srinivas L & Ganapathi TR (2011) Iron fortification of banana by the expression of soybean ferritin. *Biol Trace Elem Res* **142**: 232–241.
- Küpper H, Zhao FJ & McGrath S (1999) Cellular compartmentalisation of zinc in leaves of the hyperaccumulator *Thlaspi caerulescens*. *Plant Physiol* **119**: 305–311.
- Küpper H, Mijovilovich A, Meyer-Klaucke W & Kroneck PMH (2004) Tissue- and age-dependent differences in the complexation of cadmium and zinc in the cadmium/zinc hyperaccumulator *Thlaspi caerulescens* (Ganges ecotype) revealed by X-ray absorption spectroscopy. *Plant Physiol* **134**: 748–757.
- Lal R (2009) Soil degradation as a reason for inadequate human nutrition. *Food Sec* **1**: 45–57.
- Lamb C & Dixon R (1997) The oxidative burst in plant disease resistance. *Annu Rev Plant Physiol* **48**: 251–275.
- Lamont IL, Beare PA, Ochsner U, Vasil AI & Vasil ML (2002) Siderophore-mediated signaling regulates virulence factor production in *Pseudomonas aeruginosa*. *P Natl Acad Sci USA* **99**: 7072–7077.
- Lasat M, Baker A & Kochian L (1996) Physiological characterisation of root Zn<sup>2+</sup> absorption and translocation to shoots in Zn hyperaccumulator and nonaccumulator species of *Thlaspi*. *Plant Physiol* **112**: 1715–1722.
- Lawlor MS, O'Connor C & Miller VL (2007) Yersiniabactin is a virulence factor for *Klebsiella pneumoniae* during pulmonary infection. *Infect Immun* **75**: 1463–1472.
- Leach LH, Morris JC & Lewis TA (2007) The role of the siderophore pyridine-2,6-bis(thiocarboxylic acid) (PDTC) in zinc utilisation by *Pseudomonas putida* DSM 3601. *Biometals* **20**: 717–726.



- Leong SA & Neilands B (1981) Relationship of siderophore mediated iron assimilation to virulence in crown-gall disease. *J Bacteriol* **147**: 482–491.
- Levi C & Durbin RD (1986) The isolation and properties of a tabtoxin-hydrolyzing aminopeptidase from the periplasm of *Pseudomonas syringae* pv. *tabaci*. *Physiol Mol Plant Pathol* **28**: 345–352.
- Love A, Yun B, Laval V, Loake G & Milner J (2005) Cauliflower mosaic virus, a compatible pathogen of *Arabidopsis*, engages three distinct defense signalling pathways and activates a rapid systemic generation of reactive oxygen species. *Plant Physiol* **139**: 935–948.
- Lui G, Greenshields DL, Sammynaiken R, Hirji RN, Selvaraj G & Wei Y (2007) Targeted alterations in iron homeostasis underlie plant defense responses. *J Cell Sci* **120**: 96–605.
- Mahajan-Miklos S, Tan M-W, Rahme LG & Ausubel FM (1999) Molecular mechanisms of bacterial virulence elucidated using a *Pseudomonas aeruginosa*-*Caenorhabditis elegans* pathogenesis model. *Cell* **96**: 47–56.
- Marco GM & Stall RE (1983) Control of bacterial spot of pepper initiated by strains of *Xanthomonas campestris* pv. *vesicatoria* that differ in sensitivity to copper. *Plant Dis* **67**: 779–781.
- Marusek CM, Trobaugh NM, Flurkey WH & Inlow JK (2006) Comparative analysis of polyphenol oxidase from plant and fungal species. *J Inorg Biochem* **100**: 108–123.
- Massé E & Arguin A (2005) Ironing out the problem: new mechanisms of iron homeostasis. *Trends Biochem Sci* **30**: 462–468.
- Massé E & Gottesman S (2002) A small RNA regulates the expression of genes involved in iron metabolism in *Escherichia coli*. *P Natl Acad Sci USA* **99**: 4620–4625.
- McDevitt CA, Ogunniyi AD, Valkov E, Lawrence MC, Kobe B, McEwan AG & Paton JC (2011) A molecular mechanism for bacterial susceptibility to zinc. *PLoS Pathog* **7**: e1002357.
- McDonald M, Mila I & Scalbert A (1996) Precipitation of metal ions by plant polyphenols: optimal conditions and origin of precipitation. *J Agric Food Chem* **44**: 599–606.
- McHugh JP, Rodríguez-Quinones F, Abdul-Tehrani H, Svistunenko DA, Poole RK, Cooper CE & Andrews SC (2003) Global iron-dependent gene regulation in *Escherichia coli*: a new mechanism for iron homeostasis. *J Biol Chem* **278**: 29478–29486.
- McQueen DA & Schottel JL (1987) Purification and characterization of a novel extracellular esterase from pathogenic *Streptomyces scabies* that is inducible by zinc. *J Bacteriol* **169**: 1967–1971.
- Mergeay M, Monchy S, Vallaeys T, Auquier V, Benotmane A, Bertin P, Taghavi S, Dunn J, van der Lelie D & Wattiez R (2003) *Ralstonia metallidurans*, a bacterium specifically adapted to toxic metals: towards a catalogue of metal-responsive genes. *FEMS Microbiol Rev* **27**: 385–410.
- Meyer JM, Van VT, Stintzi A, Berge O & Winkelmann G (1995) Ornibactin production and transport properties in strains of *Burkholderia vietnamiensis* and *Burkholderia cepacia* (formerly *Pseudomonas cepacia*). *Biometals* **8**: 309–317.
- Meyer JM, Neely A, Stintzi A, Georges C & Holder IA (1996) Pyoverdine is essential for virulence of *Pseudomonas aeruginosa*. *Infect Immun* **64**: 518–523.
- Mhatre M, Srinivas L & Ganapathi TR (2011) Enhanced iron and zinc accumulation in genetically engineered pineapple plants using soybean ferritin gene. *Biol Trace Elem Res* **144**: 1219–1228.
- Miethke M & Marahiel MA (2007) Siderophore-based iron acquisition and pathogen control. *Microbiol Mol Biol Rev* **71**: 413–451.
- Mila I, Scalbert A & Expert D (1998) Iron withholding by plant polyphenols and resistance to pathogens and rots. *Phytochemistry* **42**: 1551–1555.
- Miteva E, Maneva S, Hristova D & Bojinova P (2001) Heavy metal accumulation in virus infected tomato plants. *J Phytopathol* **149**: 179–184.
- Mithöfer A, Schulze B & Boland W (2004) Biotic and heavy metal stress response in planta: evidence for common signals. *FEBS Lett* **566**: 1–5.
- Mittler R (2002) Oxidative stress, antioxidants and stress tolerance. *Trends Plant Sci* **7**: 405–410.
- Montag J, Schreiber L & Schönherr J (2006) An *in vitro* study of the nature of protective activities of copper sulphate, copper hydroxide and copper oxide against conidia of *Venturia inaequalis*. *J Phytopathol* **154**: 474–481.
- Moreau-Marquis S, O'Toole GA & Stanton BA (2009) Tobramycin and FDA approved iron chelators eliminate *Pseudomonas aeruginosa* biofilms on cystic fibrosis cells. *Am J Respir Cell Mol Biol* **41**: 305–313.
- Nadal Jimenez P, Koch G, Papaioannou E, Wahjudi M, Krzeslak J, Coenye T, Cool RH & Quax WJ (2010) Role of PvdQ in *Pseudomonas aeruginosa* virulence under iron-limiting conditions. *Microbiology* **156**: 49–59.
- Nairz M, Schroll A, Sonnweber T & Weiss G (2010) The struggle for iron – a metal at the host–pathogen interface. *Cell Microbiol* **12**: 1462–5822.
- Nakajima M, Goto M & Hibi T (2002) Similarity between copper resistance genes from *Pseudomonas syringae* pv. *actinidiae* and *P. syringae* pv. *tomato*. *J Gen Plant Pathol* **68**: 68–74.
- Neema C, Laulhère J-P & Expert D (1993) Iron deficiency induced by chrysoabactin in *Saintpaulia* leaves inoculated with *Erwinia chrysanthemi*. *Plant Physiol* **102**: 967–973.
- Neilands JB (1993) Siderophores. *Arch Biochem Biophys* **302**: 1–3.
- Neilands JB (1995) Siderophores: structure and function of microbial iron transport compounds. *J Biol Chem* **270**: 26723–26726.
- Ngok-Ngam R, Ruangkiattikul N, Mahavihanont A, Virgem SS, Sukchawalit R & Mongkolsuk S (2009) Roles of *Agrobacterium tumefaciens* RirA in iron regulation, oxidative stress response and virulence. *J Bacteriol* **191**: 2083–2090.
- Nies D (2003) Efflux mediated heavy metal resistance in prokaryotes. *FEMS Microbiol Rev* **27**: 313–339.

- Nies DH (2007) Bacterial transition metal homeostasis. *Molecular Microbiology of Heavy Metals* (Nies DH & Silver S, eds), pp. 6. Springer-Verlag, Berlin-Heidelberg.
- Nies D & Brown N (1998) Two component systems in the regulation of heavy metal resistance. *Metal Ions in Gene Regulation*. Chapman and Hall, London, UK, pp. 77–103.
- O'Malley YQ, Reszha KJ, Rasmussen GT, Abdulla MY, Denning GM & Britigan BE (2003) The *Pseudomonas* secretory product pyocyanin inhibits catalase in human lung epithelial cells. *Am J Phys Lung Cell Mol Phys* **285**: 1077–1086.
- Ong ST, Ho JZS, Ho B & Ding JL (2006) Iron-withholding strategy in innate immunity. *Immunobiology* **211**: 295–314.
- Owen J & Ackerley D (2011) Characterization of pyoverdine and achromobactin in *Pseudomonas syringae* pv. *phaseolicola* 1448a. *BMC Microbiol* **11**: 218.
- Ownley BH, Duffy BK & Weller DM (2003) Identification and manipulation of soil properties to improve the biological control performance of phenazine-producing *Pseudomonas fluorescens*. *Appl Environ Microbiol* **69**: 3333–3343.
- Palmieri ACB, Amaral AMD, Homem RA & Machado MA (2010) Differential expression of pathogenicity- and virulence-related genes of *Xanthomonas axonopodis* pv. *citri* under copper stress. *Genet Mol Biol* **33**: 348–353.
- Pandey A & Sonti RV (2010) Role of the FeoB protein and siderophore in promoting virulence of *Xanthomonas oryzae* pv. *oryzae* on rice. *J Bacteriol* **192**: 3187–3203.
- Papp-Wallace KM & Maguire ME (2006) Manganese transport and the role of manganese in virulence. *Annu Rev Microbiol* **60**: 187–209.
- Parsek MR & Singh PK (2003) Bacterial biofilms: an emerging link to disease pathogenesis. *Annu Rev Microbiol* **57**: 677–701.
- Payne SM (1993) Iron acquisition in microbial pathogenesis. *Trends Microbiol* **1**: 66–69.
- Peng M & Kuc J (1992) Peroxide generated hydrogen peroxide as a source of toxicity *in vitro* and on tobacco leaf discs. *Phytopathology* **82**: 699.
- Pierre JL & Fontecave M (1999) Iron and activated oxygen species in biology: the basic chemistry. *Biomaterials* **12**: 195–199.
- Piffanelli P, Zhou F, Casais C, Orme J, Jarosch B, Schaffrath U, Collins N, Panstruga R & Schulze-Lefert P (2002) The barley MLO modulator of defense and cell death is responsive to biotic and abiotic stress stimuli. *Plant Physiol* **129**: 1076–1085.
- Pollard A (2000) Metal hyperaccumulation: a model system for coevolutionary studies. *New Phytol* **146**: 179–181.
- Pollard A, Powell K, Harper F & Smith J (2002) The genetic basis of metal hyperaccumulation in plants. *Crit Rev Plant Sci* **21**: 539–566.
- Poschenrieder C, Tolrà R & Barceló J (2006) Can metals defend plants against biotic stress? *Trends Plant Sci* **11**: 288–295.
- Prasad MNV (2004) *Heavy Metal Stress in Plants: From Biomolecules to Ecosystems*. Springer-Verlag, Berlin, Heidelberg.
- Prasad M & de Oliveira Freitas H (2003) Metal hyperaccumulation in plants – biodiversity prospecting for phytoremediation technology. *Elec J Biotechnol* **6**: 110–146.
- Prashanth SR, Sadhasivam V & Parida A (2008) Overexpression of cytosolic copper/zinc superoxide dismutase from a mangrove plant *Avicennia marina* in *indica* Rice var Pusa Basmati-1 confers abiotic stress tolerance. *Transgenic Res* **17**: 281–291.
- Preston G (2000) *Pseudomonas syringae* pv. *tomato*: the right pathogen, of the right plant, at the right time. *Mol Plant Pathol* **1**: 263–275.
- Pungartnik C, da Silva AC, Alves de Melo S, Peres Gramacho K, de Mattos Cascardo JC, Brendel M, Micheli F & da Silva Gesteira A (2009) High-affinity copper transport and Snq2 export permease of *Saccharomyces cerevisiae* modulate cytotoxicity of PR-10 from *Theobroma cacao*. *Mol Plant Microbe Interact* **22**: 39–51.
- Ratledge C & Dover LG (2000) Iron metabolism in pathogenic bacteria. *Annu Rev Microbiol* **54**: 881–941.
- Reeves R & Baker A (2000) Metal-accumulating plants. *Phytoremediation of Toxic Metals. Using Plants to Clean Up the Environment* (Raskin I & Ensley BD, eds), pp. 193–230. Wiley Interscience, New York, USA.
- Reid TJ, Murthy MR, Sicignano A, Tanaka N, Musick WD & Rossmann MG (1981) Structure and heme environment of beef liver catalase at 2.5 Å resolution. *P Natl Acad Sci USA* **78**: 4767–4771.
- Rico A, McCraw SM & Preston GM (2011) The metabolic interface between *Pseudomonas syringae* and plant cells. *Curr Opin Microbiol* **14**: 31–38.
- Ries SM & Strobel GA (1972) A phytotoxic glycopeptide from cultures of *Corynebacterium insidiosum*. *Plant Physiol* **49**: 676–684.
- Rodríguez FI, Esch JJ, Hall AE, Binder BM, Schaller GE & Bleecker AB (1999) A copper cofactor for the ethylene receptor ETR1 in Arabidopsis. *Science* **283**: 996–998.
- Romheld V & Marschner H (1986) Evidence for a specific uptake system for iron phytosiderophores in roots of grasses. *Plant Physiol* **80**: 175–180.
- Rondon MR, Ballering KS & Thomas MG (2004) Identification and analysis of a siderophore biosynthetic gene cluster from *Agrobacterium tumefaciens* C58. *Microbiology* **150**: 3857–3866.
- Rusjan D, Strlič M, Pucko D & Korošec-Koruza Z (2007) Copper accumulation regarding the soil characteristics in Sub-Mediterranean vineyards of Slovenia. *Geoderma* **141**: 111–118.
- Russell PE (2005) A century of fungicide evolution. *J Agric Sci* **143**: 11–25.
- Samanovic MI, Ding C, Thiele DJ & Darwin KH (2012) Copper in microbial pathogenesis: meddling with the metal. *Cell Host Microbe* **11**: 106–115.
- Santagostini L, Gullotti M, De Gioia L, Fantucci P, Franzini E, Marchesini A, Monzani E & Casella L (2004) Probing the location of the substrate binding site of ascorbate oxidase

- near type 1 copper: an investigation through spectroscopic, inhibition and docking studies. *Int J Biochem Cell Biol* **36**: 881–892.
- Schenk HJ & Pscheidt JW (1998) Effect of copper bacteriocides on copper-resistant and -sensitive strains of *Pseudomonas syringae* pv. *syringae*. *Plant Dis* **82**: 397–406.
- Schottel JL, Hale V & Babcock MJ (1992) Regulation and secretion of an extracellular esterase from *Streptomyces scabies*. *Gene* **155**: 27–31.
- Schwan WR, Warrener P, Keunz E, Stover CK & Folger KR (2005) Mutations in the *cueA* gene encoding a copper homeostasis P-type ATPase reduce the pathogenicity of *Pseudomonas aeruginosa* in mice. *Int J Med Microbiol* **295**: 237–242.
- Scortichini M, Marcelletti S, Ferrante P, Petriccione M & Firrao G (2012) *Pseudomonas syringae* pv. *actinidiae*: a re-emerging, multi-faceted, pandemic pathogen. *Mol Plant Pathol* **13**: 631–640.
- Segond D, Dellagi A, Lanquar V, Rigault M, Patrit O, Thomine S & Expert D (2009) NRAMP genes function in *Arabidopsis thaliana* resistance to *Erwinia chrysanthemi* infection. *Plant J* **58**: 195–207.
- Seipke RF, Song L, Bicz J, Laskaris P, Yaxley AM, Challis GL & Loria R (2011) The plant pathogen *Streptomyces scabies* 87–22 has a functional pyochelin biosynthetic pathway that is regulated by TetR- and AfsR-family proteins. *Microbiology* **157**: 2681–2693.
- Shepherd RW & Lindow SE (2009) Two dissimilar N-acyl-homoserine lactone acylases of *Pseudomonas syringae* influence colony and biofilm morphology. *Appl Environ Microbiol* **75**: 45–53.
- Shirley M & Lamont IL (2009) Role of TonB1 in pyoverdine-mediated signaling in *Pseudomonas aeruginosa*. *J Bacteriol* **191**: 5634–5640.
- Sillanpää M (1982) *Micronutrients and the nutrient status of soils: a global study*. FAO Soils Bulletin No. 48, FAO, Rome, Italy.
- Silva-Stenicio ME, Pacheco FT, Pereira-Filho ER, Rodrigues JL, Souza AN, Etchegaray A, Gomes JE & Tsai SM (2009) Nutritional deficiency in citrus with symptoms of citrus variegated chlorosis disease. *Braz J Biol* **3**: 859–864.
- Silver S (1996) Bacterial resistance to toxic metal ions – a review. *Gene* **171**: 9–19.
- Silver S & Phung L (2005) A bacterial view of the periodic table: genes and proteins for toxic inorganic ions. *J Ind Microbiol Biotechnol* **32**: 587–605.
- Simmons CR, Fridlender M, Navarro PA & Yalpani N (2003) A maize defense-inducible gene is a major facilitator superfamily member related to bacterial multidrug resistance efflux antiporters. *Plant Mol Biol* **52**: 433–446.
- Singh MV (2008) Micronutrient deficiencies in crops and soils in India. *Micronutrient Deficiencies in Global Crop Production* (Alloway BJ, ed), pp. 93–126. Springer, Dordrecht.
- Singh PK, Parsek MR, Greenberg EP & Welsh MJ (2002) A component of innate immunity prevents bacterial biofilm development. *Nature* **417**: 552–555.
- Skaar EP (2010) The battle for iron between bacterial pathogens and their vertebrate hosts. *PLoS Pathog* **6**: e1000949.
- Smith AW, Poyner DR, Hughes HK & Lambert PA (1994) Siderophore activity of myo-inositol hexakisphosphate in *Pseudomonas aeruginosa*. *J Bacteriol* **176**: 3455–3459.
- Smits THM & Duffy B (2011) Genomics of iron acquisition in the plant pathogen *Erwinia amylovora*: insights in the biosynthetic pathway of the siderophore desferrioxamine E. *Arch Microbiol* **193**: 693–699.
- Smits THM, Rezzonico F, Kamber T, Goesmann A, Ishamiru CA, Stockwell VO, Frey JE & Duffy B (2010) The genome sequence of the biocontrol agent *Pantoea vagans* strain C9–1. *J Bacteriol* **192**: 6486–6487.
- Stähler FN, Odenbreit S, Haas R, Wilrich J, Van Vliet HM, Kusters JG, Kist M & Bereswill S (2006) The novel *Helicobacter pylori* CznABC metal efflux pump is required for cadmium, zinc and nickel resistance, urease modulation and gastric colonisation. *Infect Immun* **74**: 3845–3852.
- Stavriniades J, McCloskey JK & Ochman H (2009) Pea aphid as both host and vector for the phytopathogenic bacterium *Pseudomonas syringae*. *Appl Environ Microbiol* **75**: 2230–2235.
- Stavriniades J, No A & Ochman H (2010) A single genetic locus in the phytopathogen *Pantoea stewartii* enables gut colonization and pathogenicity in an insect host. *Environ Microbiol* **12**: 147–155.
- Stinzi A, Evan K, Meyer JM & Poole K (1998) Quorum sensing and siderophore biosynthesis in *Pseudomonas aeruginosa*: *IasR/IasI* mutants exhibit reduced pyoverdine biosynthesis. *FEMS Microbiol Lett* **166**: 341–345.
- Stoys S & Bagchi D (1995) Oxidative mechanisms in the toxicity of metal ions. *Free Radical Biol Med* **18**: 321–336.
- Stroniski A & Floriszak-Wieczorek J (1990) Effect of Cadmium on the Host. Pathogen System III. Influence of Cadmium and *Phytophthora infestans* on Membrane Permeability of Potato Leaves. *Biochem Physiol Pflanz* **186**: 417–421.
- Sundin GW & Bender CL (1993) Ecological and genetic analysis of copper and streptomycin resistance in *Pseudomonas syringae* pv. *syringae*. *Appl Environ Microbiol* **59**: 1018–1024.
- Sundin GW, Jones AL & Fulbright DW (1989) Copper resistance in *P. syringae* pv. *syringae* from cherry orchards and its associated transfer *in vitro* and *in planta* with a plasmid. *Phytopath* **79**: 861–865.
- Swingle B, Thete D, Moll M, Myers CR, Schneider DJ & Cartinhour S (2008) Characterization of the PvdS-regulated promoter motif in *Pseudomonas syringae* pv. tomato DC3000 reveals regulon members and insights regarding PvdS function in other pseudomonads. *Mol Microbiol* **68**: 871–889.
- Taguchi F, Suzuki T, Inagaki Y, Toyoda K, Shiraishi T & Ichinose Y (2010) The siderophore pyoverdine of

- Pseudomonas syringae* pv. *tabaci* 6605 is an intrinsic virulence factor in host tobacco infection. *J Bacteriol* **192**: 117–126.
- Tang D-J, Li X-J, He Y-Q, Feng J-X, Chen B & Tang J-L (2005) The zinc uptake regulator *zur* is essential for the full virulence of *Xanthomonas campestris* pv. *campestris*. *Mol Plant Microbe Interact* **7**: 652–658.
- Temple TN, Stockwell VO, Loper JE & Johnson KB (2004) Bioavailability of iron to *Pseudomonas fluorescens* strain A506 on flowers of apple and pear. *Phytopathology* **94**: 1286–1294.
- Tindale AE, Mehrotra M, Ottem D & Page WJ (2000) Dual regulation of catecholate siderophore biosynthesis in *Azotobacter vinelandii* by iron and oxidative stress. *Microbiology* **146**: 1617–1626.
- Torres M, Jones J & Dangl J (2006) Reactive oxygen species signaling in response to pathogens. *Plant Physiol* **141**: 373–378.
- Touati D (2000) Iron and oxidative stress in bacteria. *Arch Biochem Biophys* **373**: 1–6.
- Uehlinger S, Schwager S, Bernier SP, Riedel K, Nguyen DT, Sokol PA & Eberl L (2009) Identification of specific and universal virulence factors in *Burkholderia cenocepacia* strains by using multiple infection hosts. *Infect Immun* **77**: 4102–4110.
- Uppalapati SR, Ishiga Y, Wangdi T, Urbanczyk-Wochniak E, Ishiga T, Mysore KS & Bender CL (2008) Pathogenicity of *Pseudomonas syringae* pv. *tomato* on tomato seedlings: phenotypic and gene expression analyses of the virulence function of coronatine. *Mol Plant Microbe Interact* **21**: 383–395.
- Van Brusselegem F, Bailey-Serres J & Mittler R (2008) Unraveling the tapestry of networks involving reactive oxygen species in plants. *Plant Physiol* **147**: 978–984.
- Van Zweiten M, Stovold G & Van Zweiten L (2007) *Alternatives to Copper for Disease Control in the Australian Organic Industry*. Australian Government Rural Industries and Development Corporation, Kingston, Australia.
- Vanacker H, Carver T & Foyer C (1998) Pathogen-induced changes in the antioxidant status of the apoplast in barley leaves. *Plant Physiol* **117**: 1103–1114.
- Vansuyt GA, Robin JF, Curie BC & Lemanceau P (2007) Iron acquisition from Fe-pyoverdine by *Arabidopsis thaliana*. *Mol Plant Microbe Interact* **20**: 441–447.
- Vasil ML (2007) How we learnt about iron acquisition in *Pseudomonas aeruginosa*: a series of very fortunate events. *Biometals* **20**: 587–601.
- Vesk P & Reichman S (2009) Hyperaccumulators and herbivores—a Bayesian meta-analysis of feeding choice trials. *J Chem Ecol* **35**: 289–296.
- Voloudakis AE, Bender CL & Cooksey DA (1993) Similarity between copper resistance genes from *Xanthomonas campestris* and *Pseudomonas syringae*. *Appl Environ Microbiol* **59**: 1627–1634.
- Waldron K & Robinson N (2009) How do bacterial cells ensure that metalloproteins get the correct metal? *Nat Rev* **6**: 25–35.
- Wang Y, Wilks JC, Danhorn T, Ramos I, Croal L & Newman DK (2011) Phenazine-1-carboxylic acid promotes bacterial biofilm development via ferrous iron acquisition. *J Bacteriol* **193**: 3606–3617.
- Ward PP & Connelly OM (2004) Lactoferrin: role in iron homeostasis and host defense against microbial infection. *Biometals* **7**: 203–208.
- Ward HP & O'Garro LW (1992) Bacterial spot of pepper and tomato in Barbados. *Plant Dis* **76**: 1046–1048.
- Warnes SL, Caves V & Keevil CW (2011) Mechanism of copper surface toxicity in *Escherichia coli* O157:H7 and *Salmonella* involves immediate membrane depolarization followed by slower rate of DNA destruction which differs from that observed for Gram-positive bacteria. *Environ Microbiol* **7**: 1730–1743.
- Waters CM & Bassler BL (2005) Cell-to-cell communication in bacteria. *Annu Rev Cell Dev Biol* **21**: 319–346.
- Weinberg ED (1993) Human lactoferrin: a novel therapeutic with broad spectrum potential. *Perspect Biol Med* **36**: 215–221.
- Wensing A, Braun SD, Büttner P, Expert D, Völksch B, Ullrich MS & Weingart H (2010) Impact of siderophore production by *Pseudomonas syringae* pv. *syringae* 22d/93 on epiphytic fitness and biocontrol activity against *Pseudomonas syringae* pv. *glycinea* 1a/96. *Appl Environ Microbiol* **76**: 2704–2711.
- Whitby PW, VanWagoner TM, Springer JM, Morton DJ, Seale TW & Stull TL (2006) *Burkholderia cenocepacia* utilizes ferritin as an iron source. *J Med Microbiol* **55**: 661–668.
- Willekens H, Inzé D, Montagu M & Camp W (1995) Catalases in plants. *Mol Breed* **1**: 207–228.
- Williams P, Camara M, Hardman A, Swift S, Milton D, Hope VJ, Winzer K, Middleton B, Pritchard DI & Bycroft BW (2000) Quorum sensing and the population-dependent control of virulence. *Philos Trans R Soc Lond B Biol Sci* **355**: 667–680.
- Wojtaszek P (1997) Oxidative burst: an early plant response to pathogen infection. *Biochem J* **322**: 681–692.
- Wood BW & Reilly CC (2007) Chapter 16. *Mineral Nutrition and Plant Disease* (Datnoff LE, Elmer WH & Huber DM, eds), pp. 155–177. The American Phytopathological Society, St. Paul, Minnesota, USA.
- Wu T-H, Liao M-H, Kuo W-Y, Huang C-H, Hsieh H-L & Jinn T-L (2011) Characterization of copper/zinc and manganese superoxide dismutase in green bamboo (*Bambusa oldhamii*): cloning, expression and regulation. *Plant Physiol Biochem* **49**: 195–200.
- Xie Y-R, Chen Z-Y, Brown RL & Bhatnagar D (2010) Expression and functional characterization of two pathogenesis-related protein 10 genes from *Zea mays*. *J Plant Physiol* **167**: 121–130.
- Yang W, Lui Y, Chen L, Gao T, Hu B, Zhang D & Lui F (2007) Zinc uptake regulator *zur* gene involved in zinc homeostasis and virulence of *Xanthomonas oryzae* pv. *oryzae* in rice. *Curr Microbiol* **54**: 307.
- Yu JA, Peñaloza-Vázquez A, Chakrabarty AM & Bender CL (1999) Involvement of the exopolysaccharide alginate in the



- virulence and epiphytic fitness of *Pseudomonas syringae* pv. *syringae*. *Mol Microbiol* **33**: 712–720.
- Yuan M, Chu Z, Li X & Wang S (2010) The bacterial pathogen *Xanthomonas oryzae* overcomes rice defences by regulating host copper redistribution. *Plant Cell* **22**: 3164–3176.
- Yuan M, Li Z, Xiao JH & Wang SP (2011) Molecular and functional analyses of COPT/Ctr-type copper transporter-like gene family in rice. *BMC Plant Biol* **11**: 69.
- Zaini PA, Fogaça AC, Lupo FGN, Nakaya HI, Vêncio RZN & da Silva AM (2008) The iron stimulon of *Xylella fastidiosa* includes genes for type IV pilus and colicin V-like bacteriocins. *J Bacteriol* **190**: 2368–2378.
- Zelko IN, Mariani TJ & Folz RJ (2002) Superoxide dismutase multigene family: a comparison of the CuZn-SOD (SOD1), Mn-SOD (SOD2), and EC-SOD (SOD3) gene structures, evolution, and expression. *Free Radic Biol Med* **33**: 337–349.
- Zhang X-X & Rainey PB (2007) Genetic analysis of the histidine utilization (*hut*) genes in *Pseudomonas fluorescens* SBW25. *Genetics* **176**: 2165–2176.
- Zhang X-X & Rainey PB (2008) Regulation of copper homeostasis in *Pseudomonas fluorescens* SBW25. *Environ Microbiol* **10**: 3284–3294.
